# Supplementary material for: Base-promoted synthesis of diarylsulfones from sulfonyl hydrazines and diaryliodonium salts
Source: Royal Society of Chemistry journal article supplement (doi:10.1039/d2ob00389a), 2022-01-01
Supplement: d2ob00389a1.pdf [file d2ob00389a1.pdf]

*Electronic Supplementary Material (ESI)*

*This journal is © The Royal Society of Chemistry 2021*

## Supporting Information

### Base-promoted synthesis of diarylsulfones from sulfonyl hydrazines and diaryliodonium salts

Bozhen Gong,<sup>a</sup> Haibo Zhu,<sup>\*a</sup> Liu Yang,<sup>a</sup> Haifeng Wang,<sup>\*a,b</sup> Qiangwen Fan,<sup>a,c</sup> Zongbo Xie,<sup>a</sup> Zhang-Gao Le<sup>\*a</sup>

<sup>a</sup> *Jiangxi Province Key Laboratory of Synthetic Chemistry, School of Chemistry, Biology and Material Science, East China University of Technology, 330013, Nanchang, China.*

<sup>b</sup> *Pharmaceutical Research Institute, Wuhan Institute of Technology, Wuhan 430205, China.*

<sup>c</sup> *Jiangxi Key Laboratory for Mass Spectrometry and Instrumentation, East China University of Technology, Nanchang, 330013.*

*E-mail: hbzhu@ecut.edu.cn, fanqw2019@ecut.edu.cn, zbxie@ecut.edu.cn*

|                                                                          |    |
|--------------------------------------------------------------------------|----|
| 1. General .....                                                         | 1  |
| 2. Experimental sections .....                                           | 2  |
| 2.1 The synthesis of sulfonyl hydrazides .....                           | 2  |
| 2.2 General procedure for diphenyliodonium triflate .....                | 2  |
| 2.3 Optimization of reaction conditions .....                            | 2  |
| 3. GC-MS analysis of reaction mixture.....                               | 4  |
| 4. Data for the sulfone products .....                                   | 4  |
| 5. <sup>1</sup> H NMR and <sup>13</sup> C NMR spectra for compounds..... | 13 |
| 6. References .....                                                      | 42 |

## 1. General

All commercial reagents were used directly without further purification, unless otherwise stated.  $\text{CDCl}_3$  was purchased from Shanghai aladdin Biochemical Technology Co., Ltd. All Schlenk tubes and sealed vessels (50 mL) were purchased from Beijing Synthware Glass. The following abbreviations were used to describe NMR signals: s = singlet, d = doublet, t = triplet, m = multiplet, dd = doublet of doublets, q = quartet.

## 2. Experimental sections

### 2.1 The synthesis of sulfonyl hydrazides<sup>1</sup>

Hydrazine monohydrochloride (6.0 mmol) and NaOH (6.6 mmol) was added to water (30 mL) and was cooled to 0 °C. A solution of arylsulfonyl chloride (3.0 mmol) in THF (10 mL) was added by dropwise at 0 °C. The mixture was further stirred at 0 °C for 30 min, followed by addition of EtOAc (20 mL). The mixture was extracted with water ( $3 \times 10$  mL). The combined organic extract was concentrated and concentrated by silica gel column chromatography to provide the desired product.

### 2.2 General procedure for diphenyliodonium triflate<sup>2</sup>

Various symmetrical and unsymmetrical diphenyliodonium triflates were synthesized by us according to published methods.

### 2.3 Optimization of reaction conditions

Table S1. Base and Solvents Screening<sup>a</sup>

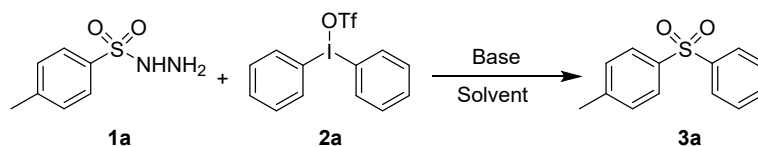

| Entry          | Base                              | Solvent                | Yield(%) <sup>b</sup> |
|----------------|-----------------------------------|------------------------|-----------------------|
| 1 <sup>c</sup> | $\text{Na}_2\text{CO}_3$ (1.0 eq) | $\text{CH}_3\text{CN}$ | trace                 |
| 2              | $\text{Na}_2\text{CO}_3$ (1.0 eq) | $\text{CH}_3\text{CN}$ | 37                    |

|    |                                         |                    |    |
|----|-----------------------------------------|--------------------|----|
| 3  | K <sub>2</sub> CO <sub>3</sub> (1.0 eq) | CH <sub>3</sub> CN | 30 |
| 4  | NaHCO <sub>3</sub> (1.0 eq)             | CH <sub>3</sub> CN | 55 |
| 5  | DABCO (1.0 eq)                          | CH <sub>3</sub> CN | 31 |
| 6  | Et <sub>3</sub> N (1.0 eq)              | CH <sub>3</sub> CN | 35 |
| 7  | -                                       | CH <sub>3</sub> CN | 20 |
| 8  | NaHCO <sub>3</sub> (0.5 eq)             | CH <sub>3</sub> CN | 43 |
| 9  | NaHCO <sub>3</sub> (1.5 eq)             | CH <sub>3</sub> CN | 37 |
| 10 | NaHCO <sub>3</sub> (1.0 eq)             | DMSO               | 51 |
| 11 | NaHCO <sub>3</sub> (1.0 eq)             | DMF                | 39 |
| 12 | NaHCO <sub>3</sub> (1.0 eq)             | Dioxane            | 56 |
| 13 | NaHCO <sub>3</sub> (1.0 eq)             | DCE                | 23 |
| 14 | NaHCO <sub>3</sub> (1.0 eq)             | H <sub>2</sub> O   | 48 |
| 15 | NaHCO <sub>3</sub> (1.0 eq)             | EtOH               | 64 |
| 16 | NaHCO <sub>3</sub> (1.0 eq)             | <i>i</i> -PrOH     | 40 |
| 17 | NaHCO <sub>3</sub> (1.0 eq)             | <i>n</i> -PrOH     | 65 |
| 18 | NaHCO <sub>3</sub> (1.0 eq)             | glycol             | 20 |
| 19 | NaHCO <sub>3</sub> (1.0 eq)             | glycerol           | 35 |
| 20 | NaHCO <sub>3</sub> (1.0 eq)             | TFE                | 39 |
| 21 | NaHCO <sub>3</sub> (1.0 eq)             | HFIP               | 35 |

<sup>a</sup> Reaction conditions: **1a** (0.2 mmol), **2a** (0.2 mmol, 1.0 equiv.), solvent (2 mL), 100 °C under an atmosphere of N<sub>2</sub> for 24 h. <sup>b</sup> Isolated yield. <sup>c</sup> CuI (10 mol%).

**Table S2.** Variation of temperature, time and molar ratio in optimization of reaction conditions<sup>a</sup>

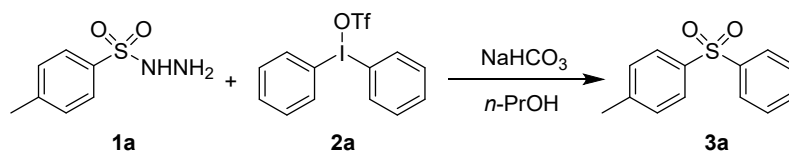

| Entry | <b>1a</b> /mmol | <b>2a</b> /mmol | T/°C | Time/h | Yield (%) <sup>b</sup> |
|-------|-----------------|-----------------|------|--------|------------------------|
| 1     | 0.2             | 0.2             | 100  | 6      | 56                     |
| 2     | 0.2             | 0.2             | 100  | 12     | 70                     |
| 3     | 0.2             | 0.2             | 100  | 18     | 75                     |
| 4     | 0.2             | 0.2             | 80   | 18     | 66                     |
| 5     | 0.2             | 0.2             | 90   | 18     | 73                     |
| 6     | 0.2             | 0.2             | 110  | 18     | 64                     |
| 7     | 0.2             | 0.2             | 120  | 18     | 64                     |
| 8     | 0.2             | 0.3             | 100  | 18     | 90                     |
| 9     | 0.2             | 0.4             | 100  | 18     | 83                     |
| 10    | 0.3             | 0.2             | 100  | 18     | 74                     |

<sup>a</sup> Reaction conditions: NaHCO<sub>3</sub> (1.0 equiv.), *n*-PrOH (2 mL), under N<sub>2</sub>. <sup>b</sup> Isolated yield.

<sup>c</sup> Under air.

### 3. GC-MS analysis of reaction mixture.

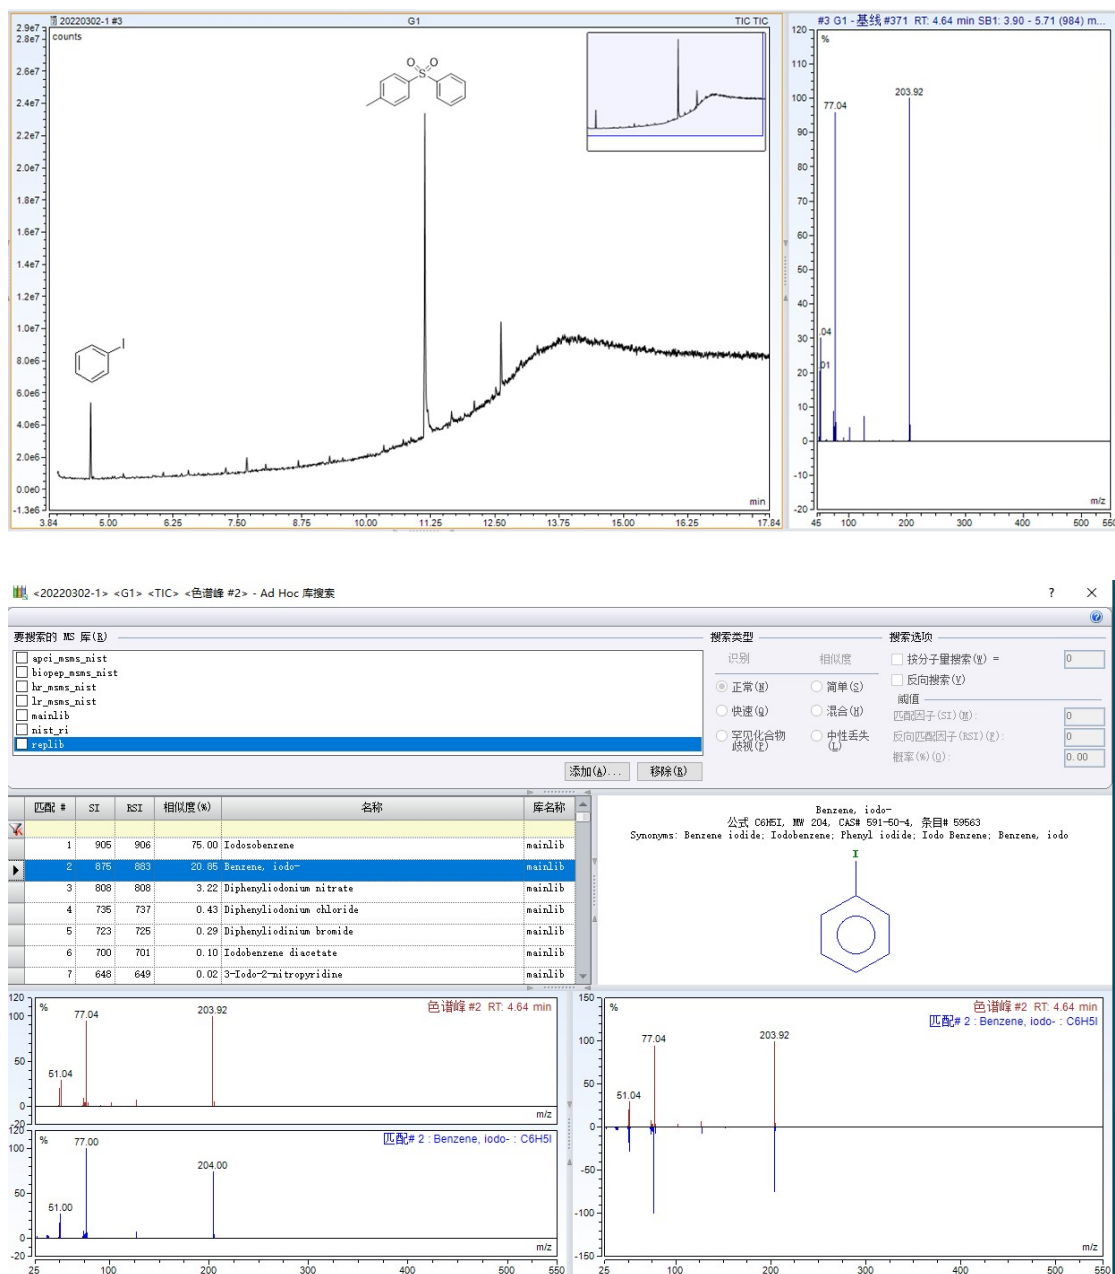

Figure S1

#### 4. Data for the sulfone products

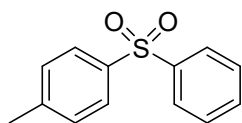

##### 1-methyl-4-(phenylsulfonyl)benzene (3a)<sup>3</sup>

White solid; mp: 117.7-119.2 °C; <sup>1</sup>H NMR (500 MHz, CDCl<sub>3</sub>) δ 7.93 (d, *J* = 7.7 Hz, 2H), 7.83 (d, *J* = 8.3 Hz, 2H), 7.55 (t, *J* = 7.4 Hz, 1H), 7.49 (t, *J* = 7.6 Hz, 2H), 7.30 (d, *J* = 8.3 Hz, 2H), 2.39 (s, 3H); <sup>13</sup>C NMR (125 MHz, CDCl<sub>3</sub>) δ 144.17, 141.92, 138.58, 133.00, 129.92, 129.22, 127.70, 127.48, 21.57.

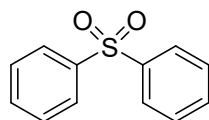

##### Sulfonyldibenzene (3b)<sup>4</sup>

White solid (41 mg, 94%); mp: 123.0-123.7 °C; <sup>1</sup>H NMR (500 MHz, CDCl<sub>3</sub>) δ 7.98 – 7.92 (m, 4H), 7.57 (t, *J* = 7.4 Hz, 2H), 7.50 (t, *J* = 7.5 Hz, 4H). <sup>13</sup>C NMR (125 MHz, CDCl<sub>3</sub>) δ 141.54, 133.20, 129.28, 127.64.

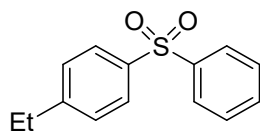

##### 1-ethyl-4-(phenylsulfonyl)benzene (3c)<sup>5</sup>

White solid (41 mg, 83%); mp: 120.7-122.1 °C; <sup>1</sup>H NMR (500 MHz, CDCl<sub>3</sub>) δ 7.94 (d, *J* = 7.5 Hz, 2H), 7.86 (d, *J* = 8.4 Hz, 2H), 7.54 (t, *J* = 7.3 Hz, 1H), 7.49 (t, *J* = 7.4 Hz, 2H), 7.32 (d, *J* = 8.4 Hz, 2H), 2.68 (q, *J* = 7.6 Hz, 2H), 1.22 (t, *J* = 7.6 Hz, 3H). <sup>13</sup>C NMR (125 MHz, CDCl<sub>3</sub>) δ 149.24, 140.88, 137.71, 131.98, 128.19, 127.75, 126.75, 126.47, 27.78, 14.05.

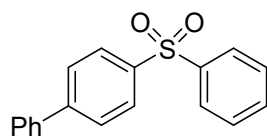

##### 4-(phenylsulfonyl)-1,1'-biphenyl (3d)<sup>3</sup>

White solid (55.3 mg, 94%); mp: 144.7-145.6 °C; <sup>1</sup>H NMR (500 MHz, CDCl<sub>3</sub>) δ 8.00 (t, *J* = 8.5 Hz, 4H), 7.70 (d, *J* = 8.5 Hz, 2H), 7.57 (dd, *J* = 6.5, 5.1 Hz, 3H), 7.52 (t, *J* = 7.4 Hz, 2H), 7.46 (t, *J* = 7.4 Hz, 2H), 7.40 (t, *J* = 7.3 Hz, 1H). <sup>13</sup>C NMR (125 MHz, CDCl<sub>3</sub>) δ 146.16, 141.69, 140.07, 139.13, 133.19, 129.32, 129.04, 128.58, 128.19, 127.93, 127.63, 127.33.

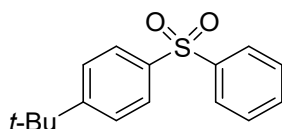

### 1-(tert-butyl)-4-(phenylsulfonyl)benzene (3e)<sup>6</sup>

White solid (47.8 mg, 87%); mp: 156.8-159.1 °C; <sup>1</sup>H NMR (500 MHz, CDCl<sub>3</sub>) δ 7.95 (d, *J* = 7.4 Hz, 2H), 7.87 (d, *J* = 8.7 Hz, 2H), 7.59 – 7.47 (m, 5H), 1.30 (s, 9H). <sup>13</sup>C NMR (125 MHz, CDCl<sub>3</sub>) δ 157.06, 141.88, 138.48, 133.01, 129.21, 127.57, 127.50, 126.30, 35.16, 31.01.

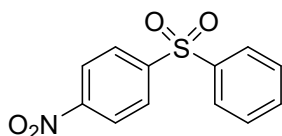

### 1-nitro-4-(phenylsulfonyl)benzene (3f)<sup>3</sup>

White solid (36.4 mg, 69%); mp: 143.6- 145.0°C; <sup>1</sup>H NMR (500 MHz, CDCl<sub>3</sub>) δ 8.35 (d, *J* = 8.9 Hz, 2H), 8.14 (d, *J* = 8.9 Hz, 2H), 7.98 (d, *J* = 7.7 Hz, 2H), 7.65 (t, *J* = 7.4 Hz, 1H), 7.57 (t, *J* = 7.7 Hz, 2H). <sup>13</sup>C NMR (125 MHz, CDCl<sub>3</sub>) δ 150.35, 147.36, 140.00, 134.19, 129.75, 129.02, 128.06, 124.58.

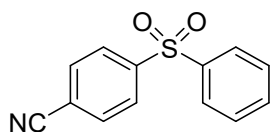

### 4-(phenylsulfonyl)benzotrile (3g)<sup>3</sup>

White solid (29.6 mg, 61%); mp: 124.9- 125.7 °C; <sup>1</sup>H NMR (500 MHz, CDCl<sub>3</sub>) δ 8.06 (d, *J* = 8.4 Hz, 2H), 7.96 (d, *J* = 7.6 Hz, 2H), 7.81 (d, *J* = 8.4 Hz, 2H), 7.64 (t, *J* = 7.4 Hz, 1H), 7.56 (t, *J* = 7.7 Hz, 2H). <sup>13</sup>C NMR (125 MHz, CDCl<sub>3</sub>) δ 145.86, 140.11, 134.08, 133.13, 129.70, 128.31, 128.01, 117.19, 116.94.

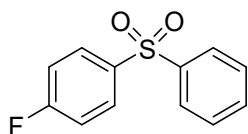

#### 1-fluoro-4-(phenylsulfonyl)benzene (3h)<sup>4</sup>

White solid (43.5 mg, 92%); mp: 110.9- 113.1 °C; <sup>1</sup>H NMR (500 MHz, CDCl<sub>3</sub>) δ 8.00 – 7.91 (m, 4H), 7.52 (s, 3H), 7.18 (t, *J* = 8.6 Hz, 2H). <sup>13</sup>C NMR (125 MHz, CDCl<sub>3</sub>) δ 165.42(d, *J* = 255.78 Hz), 141.42, 137.64(d, *J* = 3.78 Hz), 133.34, 130.48(d, *J* = 10.08 Hz), 129.39, 127.56, 116.61(d, *J* = 22.68 Hz).

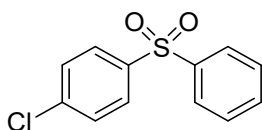

#### 1-chloro-4-(phenylsulfonyl)benzene (3i)<sup>4</sup>

White solid (44.1 mg, 87%); mp: 90.3- 92.2 °C; <sup>1</sup>H NMR (500 MHz, CDCl<sub>3</sub>) δ 7.96 – 7.91 (m, 2H), 7.91 – 7.86 (m, 2H), 7.59 (t, *J* = 7.4 Hz, 1H), 7.55 – 7.45 (m, 4H). <sup>13</sup>C NMR (125 MHz, CDCl<sub>3</sub>) δ 141.16, 140.09, 139.90, 133.45, 129.62, 129.42, 129.12, 127.63.

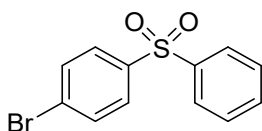

#### 1-bromo-4-(phenylsulfonyl)benzene (3j)<sup>4</sup>

White solid (47 mg, 79%); mp: 105.9 – 106.6 °C; <sup>1</sup>H NMR (500 MHz, CDCl<sub>3</sub>) δ 7.93 (dd, *J* = 8.3, 1.3 Hz, 2H), 7.81 (d, *J* = 8.6 Hz, 2H), 7.64 (d, *J* = 8.5 Hz, 2H), 7.59 (t, *J* = 7.4 Hz, 1H), 7.52 (t, *J* = 7.6 Hz, 2H). <sup>13</sup>C NMR (125 MHz, CDCl<sub>3</sub>) δ 141.10, 140.63, 133.47, 132.60, 129.43, 129.19, 128.46, 127.64.

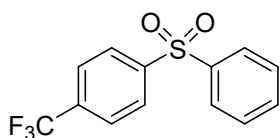

#### 1-(phenylsulfonyl)-4-(trifluoromethyl)benzene (3k)<sup>6</sup>

White solid (50.6 mg, 88%); mp: 89.7- 90.5 °C; <sup>1</sup>H NMR (500 MHz, CDCl<sub>3</sub>) δ 8.08 (d, *J* = 8.2 Hz, 2H), 8.00 – 7.94 (m, 2H), 7.77 (d, *J* = 8.3 Hz, 2H), 7.58 (dt, *J* = 36.2, 7.3

Hz, 3H).  $^{13}\text{C}$  NMR (125 MHz,  $\text{CDCl}_3$ )  $\delta$  145.18, 140.54, 134.84 (q,  $J = 32.76$  Hz), 133.81, 129.56, 128.21, 127.90, 123.46 (q,  $J = 3.78$  Hz), 123.09 (q,  $J = 273.42$  Hz).

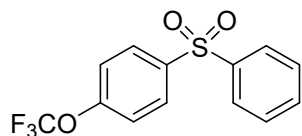

### 1-(phenylsulfonyl)-4-(trifluoromethoxy)benzene (3l)<sup>7</sup>

White solid (53.9 mg, 89%); mp: 59.3-60.7 °C;  $^1\text{H}$  NMR (500 MHz,  $\text{CDCl}_3$ )  $\delta$  8.00 (d,  $J = 8.9$  Hz, 2H), 7.98 – 7.93 (m, 2H), 7.60 (t,  $J = 7.4$  Hz, 1H), 7.54 (t,  $J = 7.6$  Hz, 2H), 7.33 (d,  $J = 8.7$  Hz, 2H).  $^{13}\text{C}$  NMR (125 MHz,  $\text{CDCl}_3$ )  $\delta$  152.55, 141.04, 139.92, 133.57, 129.90, 129.49, 127.74, 123.26, 121.10, 120.16 (q,  $J = 260.82$  Hz).

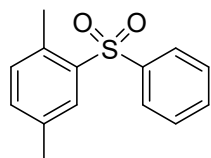

### 1,4-dimethyl-2-(phenylsulfonyl)benzene (3m)<sup>8</sup>

White solid (41.9 mg, 85%); mp: 117.1-119.3 °C;  $^1\text{H}$  NMR (500 MHz,  $\text{CDCl}_3$ )  $\delta$  8.05 (s, 1H), 7.88 – 7.84 (m, 2H), 7.57 (t,  $J = 7.4$  Hz, 1H), 7.49 (t,  $J = 7.6$  Hz, 2H), 7.29 (d,  $J = 7.7$  Hz, 1H), 7.11 (d,  $J = 7.7$  Hz, 1H), 2.42 (s, 3H), 2.37 (s, 3H).  $^{13}\text{C}$  NMR (125 MHz,  $\text{CDCl}_3$ )  $\delta$  141.41, 138.32, 136.49, 134.82, 134.40, 132.97, 132.64, 129.75, 129.02, 127.59, 20.94, 19.73.

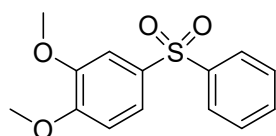

### 1,2-dimethoxy-4-(phenylsulfonyl)benzene (3n)<sup>8</sup>

White solid (49.9 mg, 89%); mp: 112.3-113.3 °C;  $^1\text{H}$  NMR (500 MHz,  $\text{CDCl}_3$ )  $\delta$  7.91 (dd,  $J = 7.1, 1.5$  Hz, 2H), 7.58 – 7.45 (m, 4H), 7.37 (d,  $J = 2.1$  Hz, 1H), 6.92 (d,  $J = 8.5$  Hz, 1H), 3.89 (d,  $J = 3.0$  Hz, 6H).  $^{13}\text{C}$  NMR (125 MHz,  $\text{CDCl}_3$ )  $\delta$  153.05, 149.26, 142.24, 133.05, 132.94, 129.25, 127.26, 121.94, 110.87, 109.86, 56.28, 56.23.

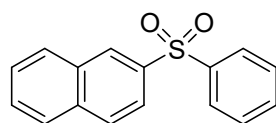

### 2-(phenylsulfonyl)naphthalene (3o)<sup>3</sup>



White solid (49.2 mg, 91%); mp: 113.5 – 115.0 °C; <sup>1</sup>H NMR (500 MHz, CDCl<sub>3</sub>) δ 8.59 (s, 1H), 8.04 – 7.96 (m, 3H), 7.93 (d, *J* = 8.7 Hz, 1H), 7.90 – 7.83 (m, 2H), 7.66 – 7.58 (m, 2H), 7.56 (t, *J* = 7.3 Hz, 1H), 7.50 (t, *J* = 7.4 Hz, 2H). <sup>13</sup>C NMR (125 MHz, CDCl<sub>3</sub>) δ 141.59, 138.35, 134.99, 133.19, 132.19, 129.66, 129.40, 129.29, 129.16, 129.09, 127.92, 127.70, 127.64, 122.67.

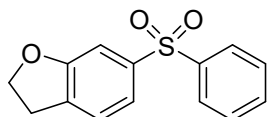

**6-(phenylsulfonyl)-2,3-dihydrobenzofuran (3p)**

White solid (41.7 mg, 80%), R<sub>f</sub>: 0.51 (PE/EtOAc=6/1); mp: 121.1 – 122.0 °C; <sup>1</sup>H NMR (500 MHz, CDCl<sub>3</sub>) δ 7.94 – 7.89 (m, 2H), 7.75 (d, *J* = 7.0 Hz, 2H), 7.54 (t, *J* = 7.3 Hz, 1H), 7.49 (t, *J* = 7.4 Hz, 2H), 6.83 (d, *J* = 9.1 Hz, 1H), 4.65 (t, *J* = 8.8 Hz, 2H), 3.24 (t, *J* = 8.8 Hz, 2H). <sup>13</sup>C NMR (125 MHz, CDCl<sub>3</sub>) δ 164.33, 142.51, 133.02, 132.76, 129.47, 129.19, 128.67, 127.24, 124.93, 109.78, 72.37, 28.97. HRMS (ESI) calcd for C<sub>14</sub>H<sub>12</sub>O<sub>3</sub>S (M + H)<sup>+</sup> 261.0507, found 261.0576.

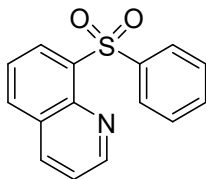

**8-(phenylsulfonyl)quinoline (3q)<sup>4</sup>**

White solid (34.3 mg, 64%); mp: 117.7 – 119.2 °C; <sup>1</sup>H NMR (500 MHz, CDCl<sub>3</sub>) δ 8.96 (d, *J* = 2.6 Hz, 1H), 8.72 (d, *J* = 7.4 Hz, 1H), 8.24 (d, *J* = 7.4 Hz, 2H), 8.17 (d, *J* = 8.3 Hz, 1H), 8.07 (d, *J* = 8.2 Hz, 1H), 7.69 (t, *J* = 7.8 Hz, 1H), 7.52 (t, *J* = 7.3 Hz, 1H), 7.49 – 7.42 (m, 3H). <sup>13</sup>C NMR (125 MHz, CDCl<sub>3</sub>) δ 151.19, 143.71, 141.78, 137.80, 136.33, 134.66, 132.92, 131.82, 129.19, 128.93, 128.31, 125.51, 122.11.

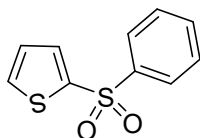

**2-(phenylsulfonyl)thiophene (3r)<sup>3</sup>**

White solid (12.5 mg, 28%); mp: 120.5– 122.1 °C; <sup>1</sup>H NMR (500 MHz, CDCl<sub>3</sub>) δ 8.03 – 7.98 (m, 2H), 7.70 (dd, *J* = 3.8, 1.3 Hz, 1H), 7.65 (dd, *J* = 5.0, 1.3 Hz, 1H), 7.55 (dt, *J* = 31.8, 7.3 Hz, 3H), 7.09 (dd, *J* = 4.9, 3.8 Hz, 1H). <sup>13</sup>C NMR (125 MHz, CDCl<sub>3</sub>) δ 142.99, 142.02, 133.91, 133.39, 133.32, 129.32, 127.86, 127.31.

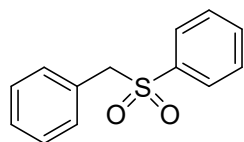

**(benzylsulfonyl)benzene (3s)<sup>9</sup>**

White solid (20.1 mg, 43%); mp: 142.7 – 143.9 °C; <sup>1</sup>H NMR (500 MHz, CDCl<sub>3</sub>) δ 7.65 – 7.58 (m, 3H), 7.48 – 7.42 (m, 2H), 7.32 (t, *J* = 7.4 Hz, 1H), 7.28 – 7.23 (m, 2H), 7.08 (d, *J* = 7.2 Hz, 2H), 4.31 (s, 2H). <sup>13</sup>C NMR (125 MHz, CDCl<sub>3</sub>) δ 137.79, 133.76, 130.84, 128.92, 128.80, 128.65, 128.61, 128.10, 62.89.

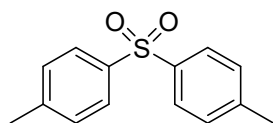

**4,4'-sulfonylbis(methylbenzene) (4a)<sup>10</sup>**

White solid (35.2 mg, 72%); mp: 145.5 - 145.8 °C; <sup>1</sup>H NMR (500 MHz, CDCl<sub>3</sub>) δ 7.81 (d, *J* = 8.3 Hz, 4H), 7.28 (d, *J* = 8.1 Hz, 4H), 2.39 (s, 6H). <sup>13</sup>C NMR (125 MHz, CDCl<sub>3</sub>) δ 143.96, 139.02, 129.88, 127.57, 21.58.

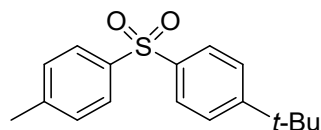

**1-(tert-butyl)-4-tosylbenzene (4b)<sup>11</sup>**

White solid (55.3 mg, 96%); mp: 142.2-143.1 °C <sup>1</sup>H NMR (500 MHz, CDCl<sub>3</sub>) δ 7.84 (dd, *J* = 8.4, 5.2 Hz, 4H), 7.49 (d, *J* = 8.6 Hz, 2H), 7.29 (d, *J* = 8.2 Hz, 2H), 2.39 (s, 3H), 1.30 (s, 9H). <sup>13</sup>C NMR (125 MHz, CDCl<sub>3</sub>) δ 156.86, 143.96, 138.98, 138.90, 129.88, 127.67, 127.37, 126.28, 35.17, 31.06, 21.59.

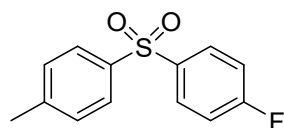

**1-fluoro-4-tosylbenzene (4c)<sup>10</sup>**

White solid (30.7 mg, 76%); mp: 106.1-107.2 °C; <sup>1</sup>H NMR (500 MHz, CDCl<sub>3</sub>) δ 7.95 (dd, *J* = 8.9, 5.1 Hz, 2H), 7.81 (d, *J* = 8.3 Hz, 2H), 7.31 (d, *J* = 8.4 Hz, 2H), 7.16 (t, *J* = 8.6 Hz, 2H), 2.40 (s, 3H). <sup>13</sup>C NMR (125 MHz, CDCl<sub>3</sub>) δ 166.35, 164.31, 144.39, 138.49, 138.07(d, *J* = 2.52 Hz), 130.32(d, *J* = 10.08 Hz), 130.04, 127.64, 116.54(d, *J* = 22.68 Hz), 21.61.

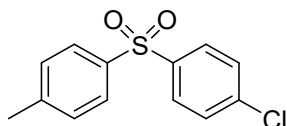

**1-chloro-4-tosylbenzene (4d)<sup>10</sup>**

White solid (39.3 mg, 67%); mp: 130.5-131.6 °C; <sup>1</sup>H NMR (500 MHz, CDCl<sub>3</sub>) δ 7.86 (d, *J* = 8.7 Hz, 2H), 7.81 (d, *J* = 8.3 Hz, 2H), 7.46 (d, *J* = 8.7 Hz, 2H), 7.31 (d, *J* = 8.0 Hz, 2H), 2.40 (s, 3H). <sup>13</sup>C NMR (125 MHz, CDCl<sub>3</sub>) δ 144.55, 140.52, 139.68, 138.22, 130.08, 129.58, 128.99, 127.72, 21.63.

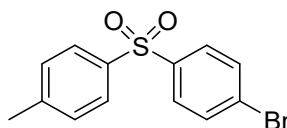

**1-bromo-4-tosylbenzene (4e)<sup>10</sup>**

White solid (47.5 mg, 76%); mp: 133.7-134.2 °C; <sup>1</sup>H NMR (500 MHz, CDCl<sub>3</sub>) δ 7.80 (dd, *J* = 10.9, 8.5 Hz, 4H), 7.63 (d, *J* = 8.5 Hz, 2H), 7.31 (d, *J* = 8.2 Hz, 2H), 2.40 (s, 3H). <sup>13</sup>C NMR (125 MHz, CDCl<sub>3</sub>) δ 144.57, 141.06, 138.16, 132.56, 130.09, 129.07, 128.25, 127.73, 21.64.

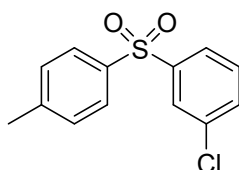

**1-chloro-3-tosylbenzene (4f)<sup>10</sup>**

White solid (41.6 mg, 79%); mp: 128.3-129.4 °C; <sup>1</sup>H NMR (500 MHz, CDCl<sub>3</sub>) δ 7.91 (s, 1H), 7.82 (t, *J* = 8.0 Hz, 3H), 7.51 (d, *J* = 8.0 Hz, 1H), 7.43 (t, *J* = 7.9 Hz, 1H), 7.32 (d, *J* = 8.3 Hz, 2H), 2.41 (s, 3H). <sup>13</sup>C NMR (125 MHz, CDCl<sub>3</sub>) δ 144.75, 143.75, 137.89, 135.41, 133.19, 130.60, 130.14, 127.88, 127.56, 125.64, 21.65.

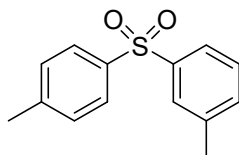

**1-methyl-3-tosylbenzene (4g)<sup>10</sup>**

White solid (42 mg, 85%); mp: 114.2-115.7 °C; <sup>1</sup>H NMR (500 MHz, CDCl<sub>3</sub>) δ 7.83 (d, *J* = 8.3 Hz, 2H), 7.73 (d, *J* = 6.5 Hz, 2H), 7.40 – 7.32 (m, 2H), 7.29 (d, *J* = 8.1 Hz, 2H), 2.39 (s, 6H). <sup>13</sup>C NMR (125 MHz, CDCl<sub>3</sub>) δ 144.10, 141.76, 139.50, 138.76, 133.86, 129.91, 129.11, 127.80, 127.69, 124.68, 21.60, 21.37.

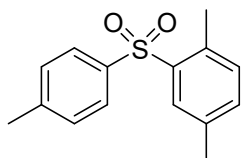

**1,4-dimethyl-2-tosylbenzene (4h)<sup>5</sup>**

White solid (51.6 mg, 97%); mp: 104.9-106.7 °C; <sup>1</sup>H NMR (500 MHz, CDCl<sub>3</sub>) δ 8.03 (s, 1H), 7.74 (d, *J* = 8.3 Hz, 2H), 7.30 – 7.26 (m, 3H), 7.09 (d, *J* = 7.7 Hz, 1H), 2.41 (s, 3H), 2.40 (s, 3H), 2.37 (s, 3H). <sup>13</sup>C NMR (125 MHz, CDCl<sub>3</sub>) δ 143.87, 138.68, 138.45, 136.40, 134.69, 134.22, 132.58, 129.63, 129.60, 127.68, 21.60, 20.93, 19.73.

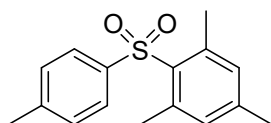

**1,3,5-trimethyl-2-tosylbenzene (4i)<sup>10</sup>**

White solid (39.6 mg, 72%); mp: 118.3 - 118.8 °C; <sup>1</sup>H NMR (500 MHz, CDCl<sub>3</sub>) δ 7.67 (d, *J* = 8.3 Hz, 2H), 7.25 (s, 1H), 6.93 (s, 2H), 2.59 (s, 6H), 2.39 (s, 3H), 2.29 (s, 3H). <sup>13</sup>C NMR (125 MHz, CDCl<sub>3</sub>) δ 143.40, 143.21, 140.61, 139.97, 134.13, 132.19, 129.49, 126.33, 22.87, 21.57, 21.04.

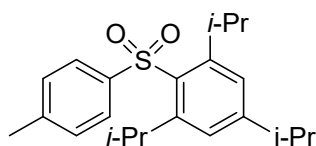

**1,3,5-triisopropyl-2-tosylbenzene (4j)**

Colourless liquid (34.6 mg, 48%), *R*<sub>f</sub>: 0.53(PE/EtOAc=9/1); <sup>1</sup>H NMR (500 MHz, CDCl<sub>3</sub>) δ 7.64 (d, *J* = 8.3 Hz, 2H), 7.27 (d, *J* = 8.1 Hz, 2H), 7.16 (s, 2H), 4.19 (hept, *J* = 6.7 Hz, 2H), 2.90 (hept, *J* = 6.9 Hz, 1H), 2.39 (s, 3H), 1.25 (d, *J* = 6.9 Hz, 6H), 1.13 (d, *J* = 6.8 Hz, 12H). <sup>13</sup>C NMR (125 MHz, CDCl<sub>3</sub>) δ 153.68, 151.21, 142.95, 142.38, 132.58, 129.53, 125.69, 124.00, 34.22, 29.40, 24.66, 23.60, 21.55. HRMS (ESI) calcd for C<sub>22</sub>H<sub>30</sub>O<sub>2</sub>S (M + H)<sup>+</sup> 358.1967, found 359.2042.

## 5. $^1\text{H}$ NMR and $^{13}\text{C}$ NMR spectra for compounds

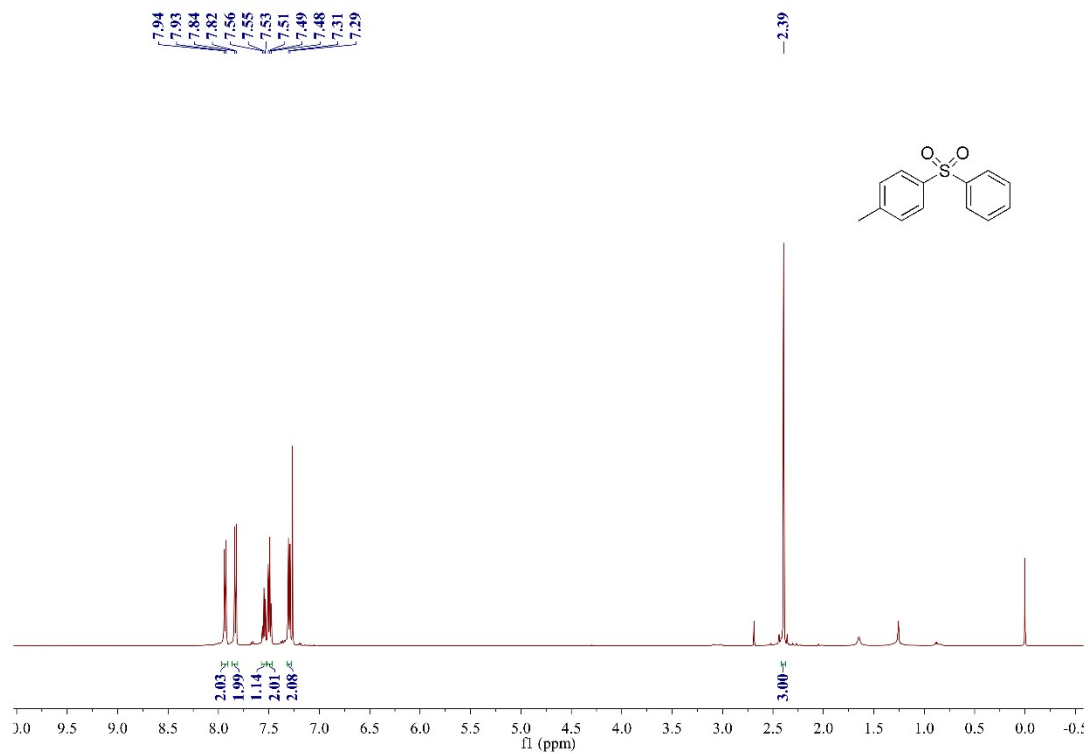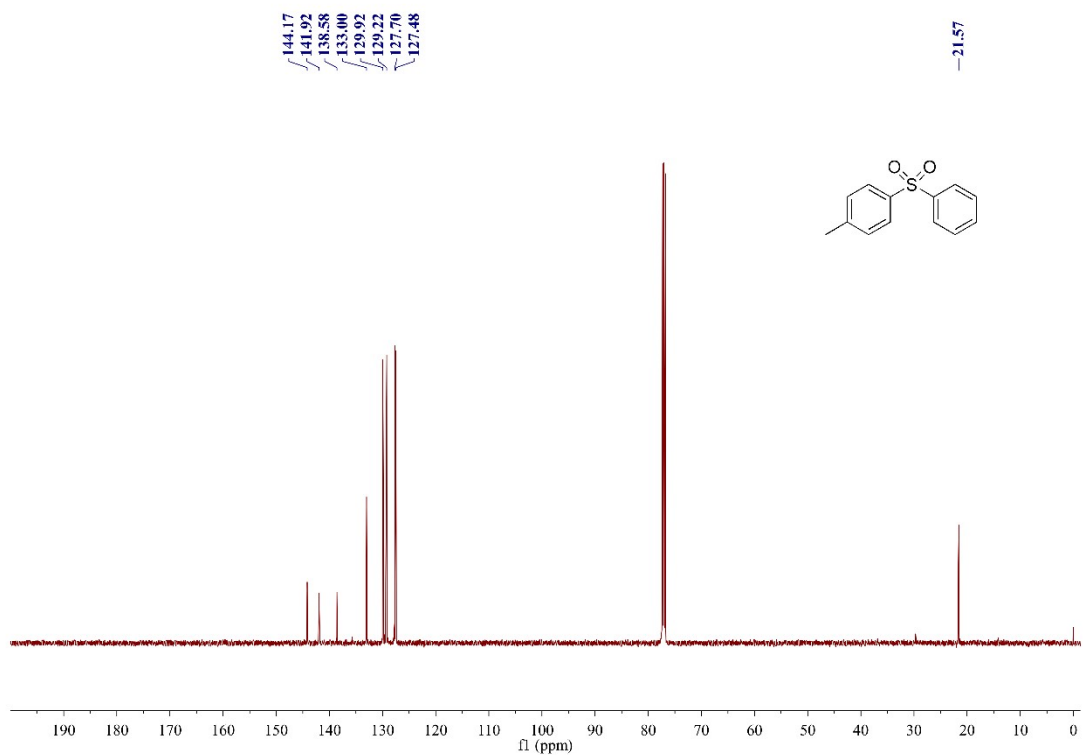

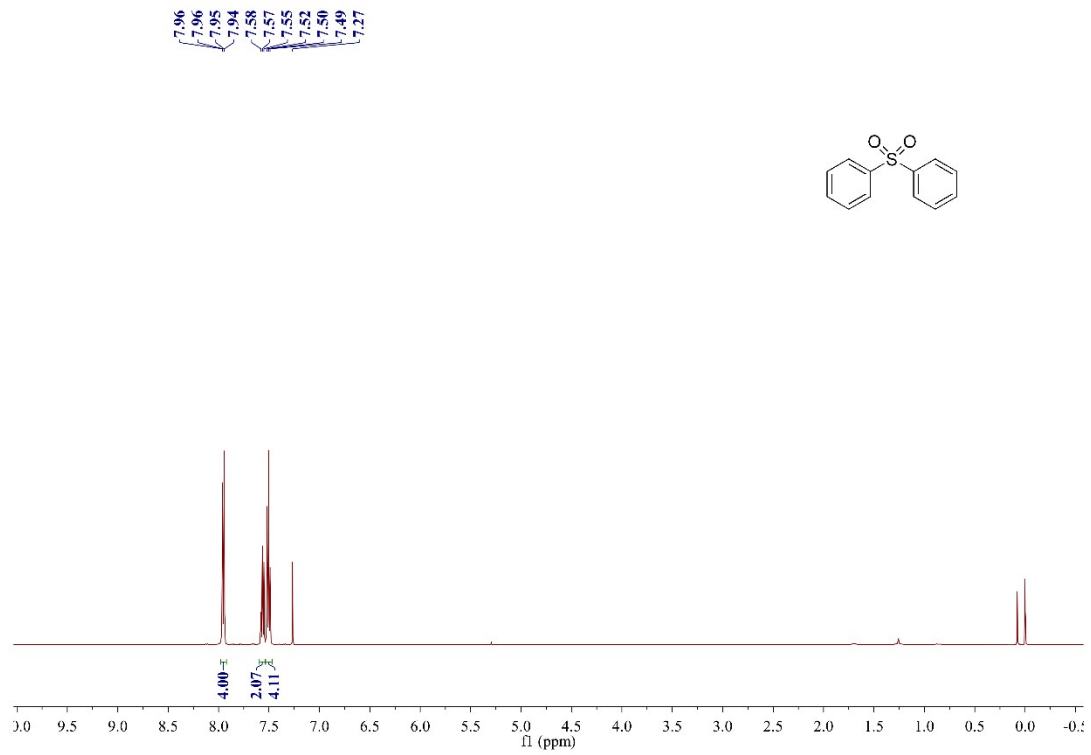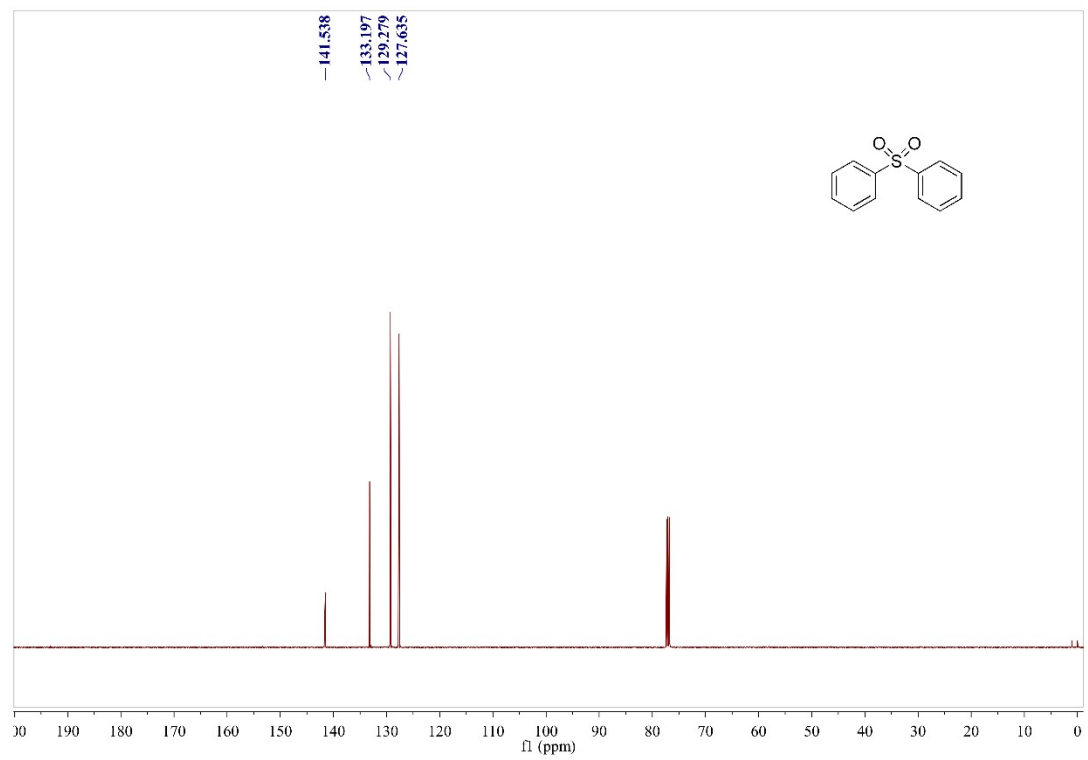

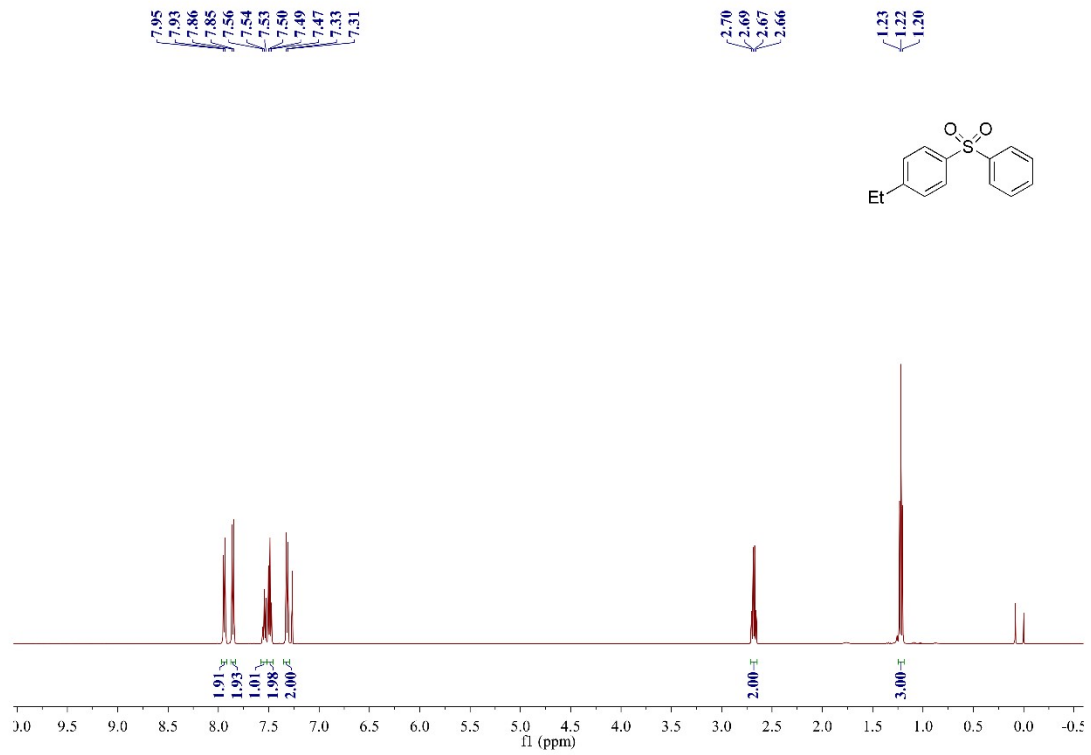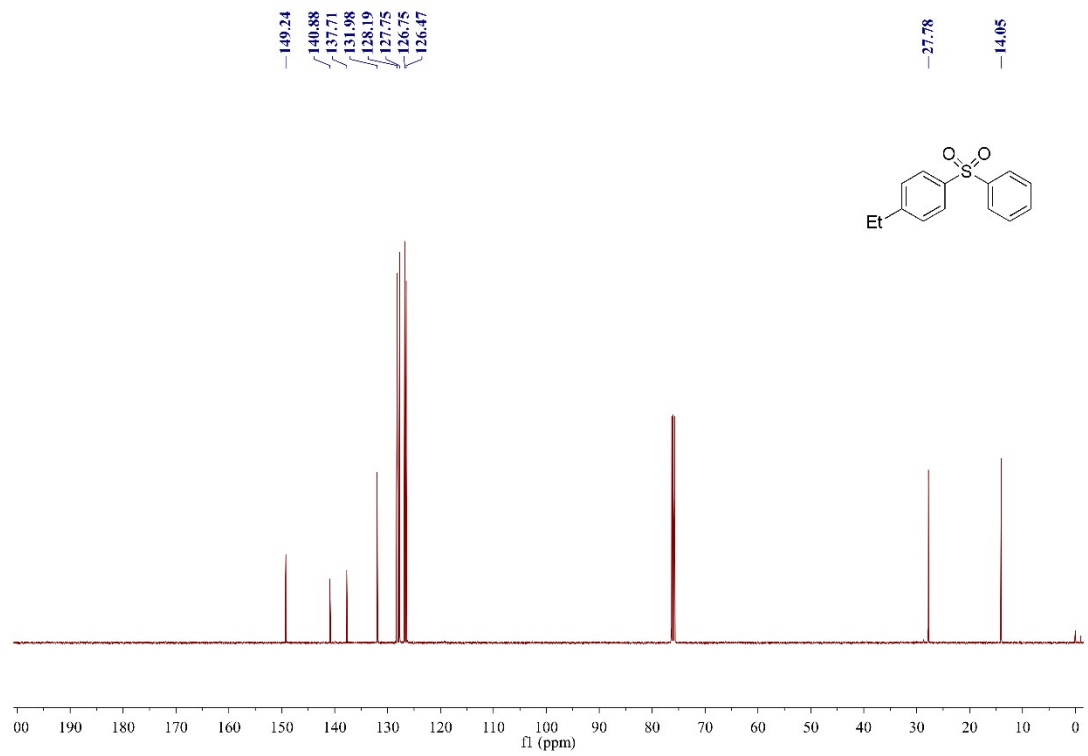

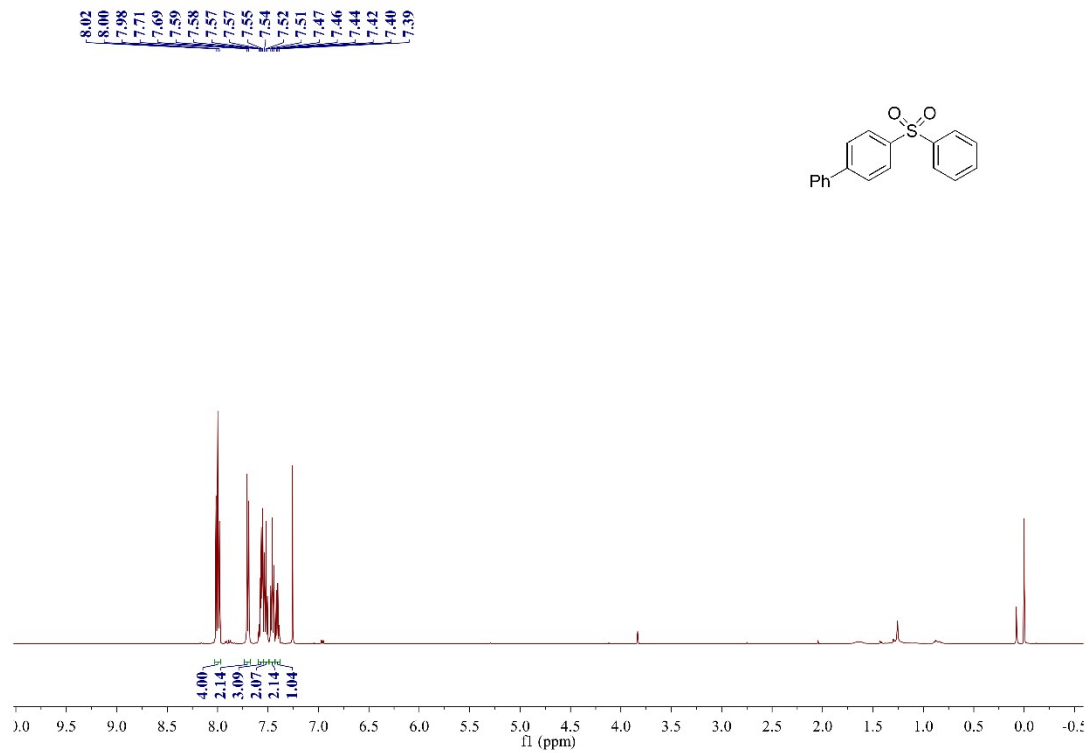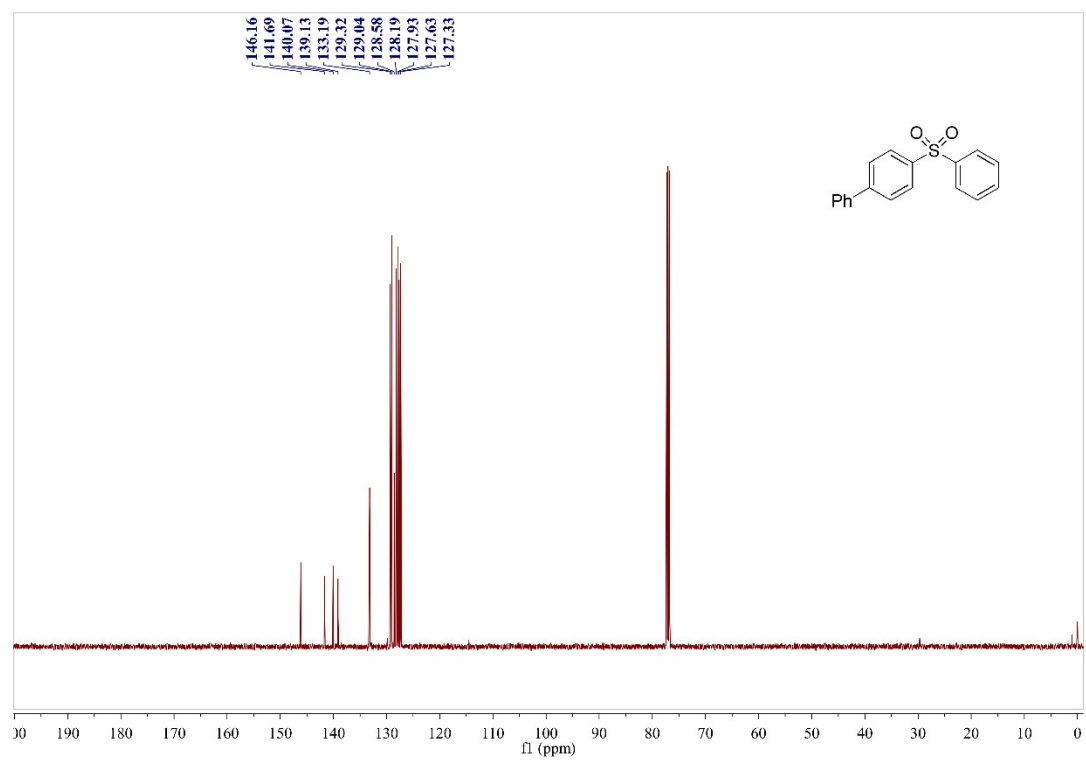



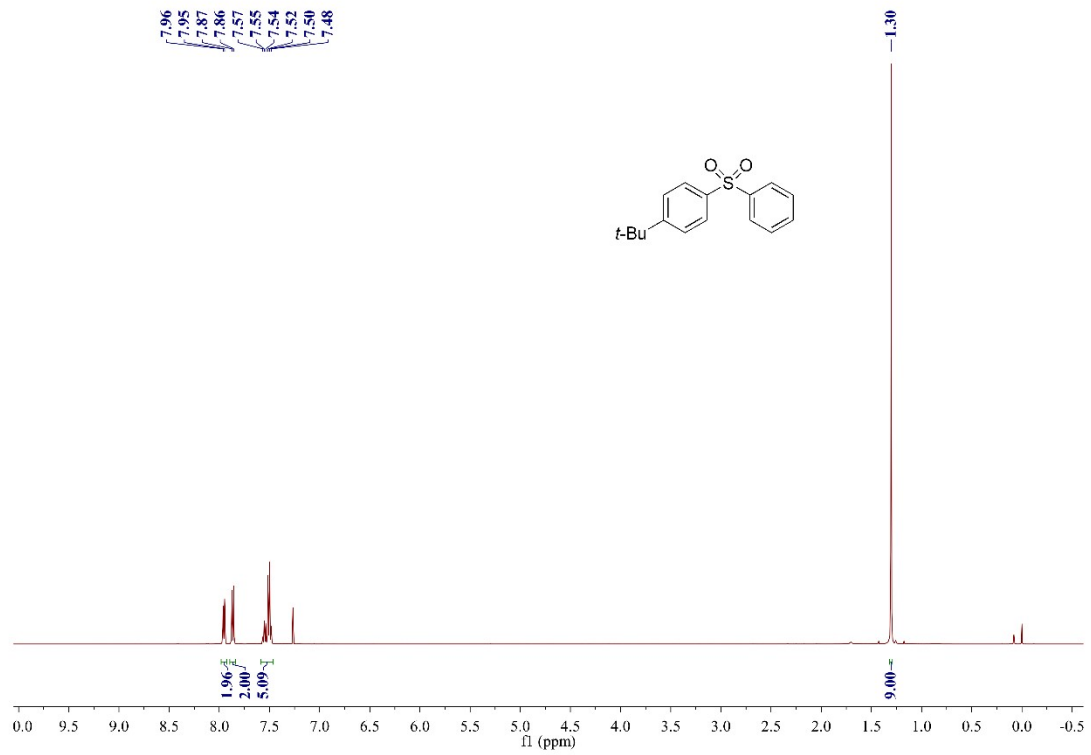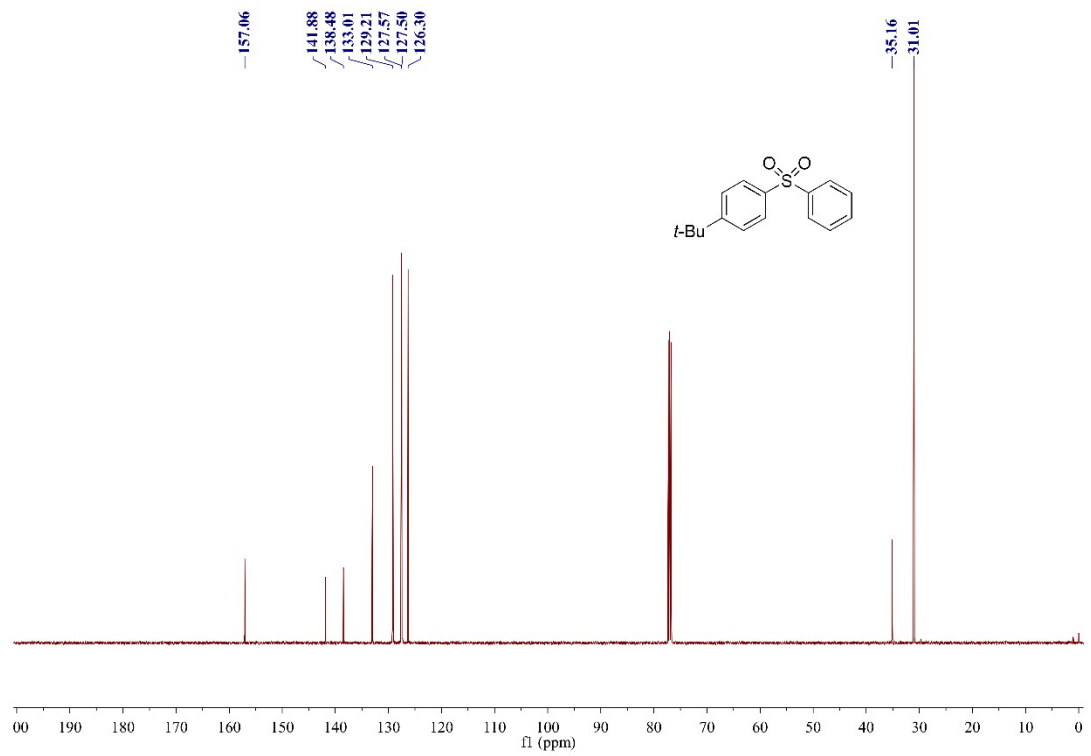

8.36  
8.34  
8.15  
8.13  
7.99  
7.97  
7.66  
7.63  
7.58  
7.57

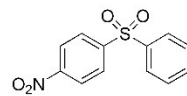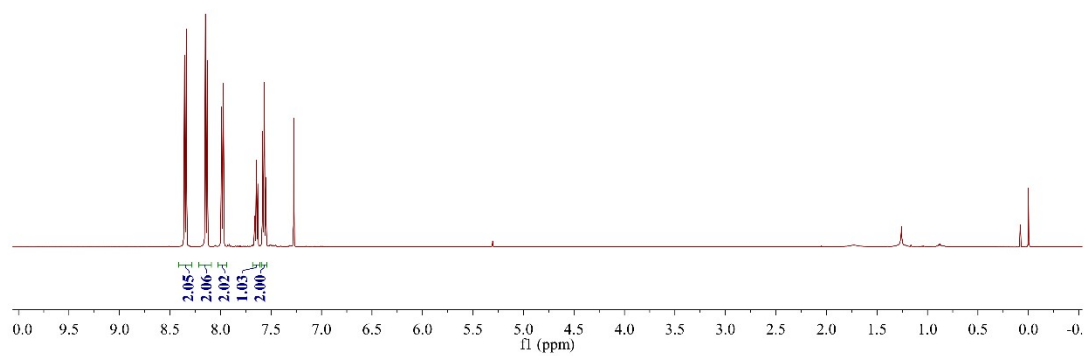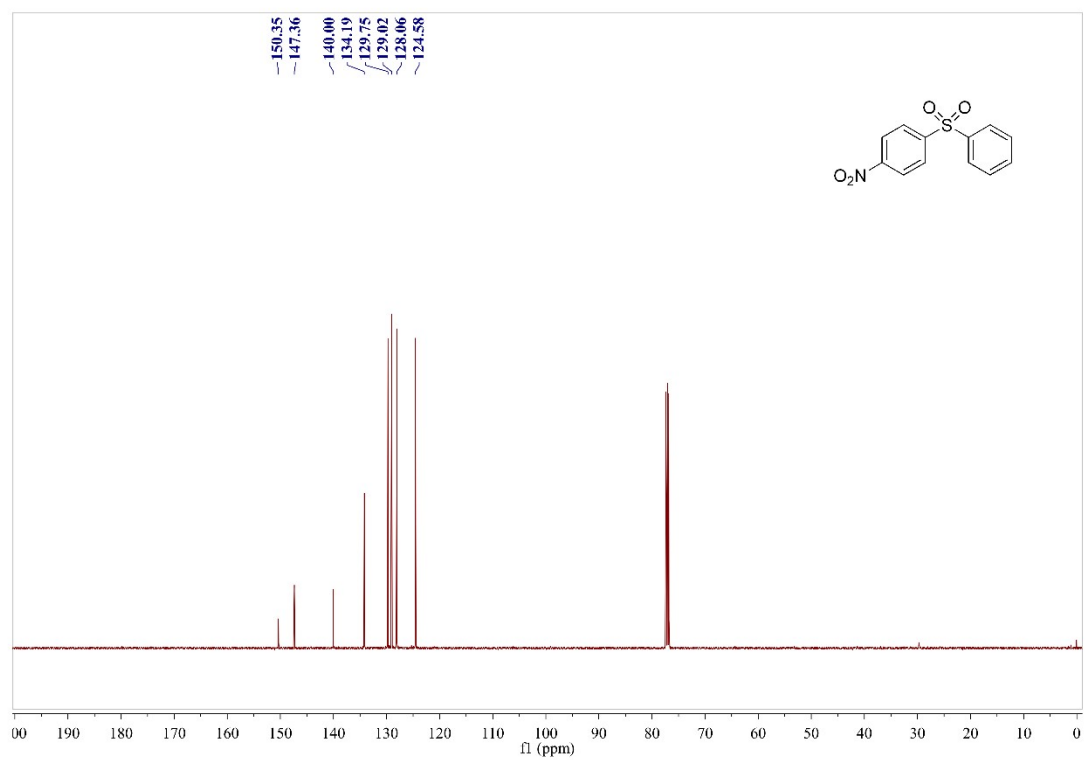

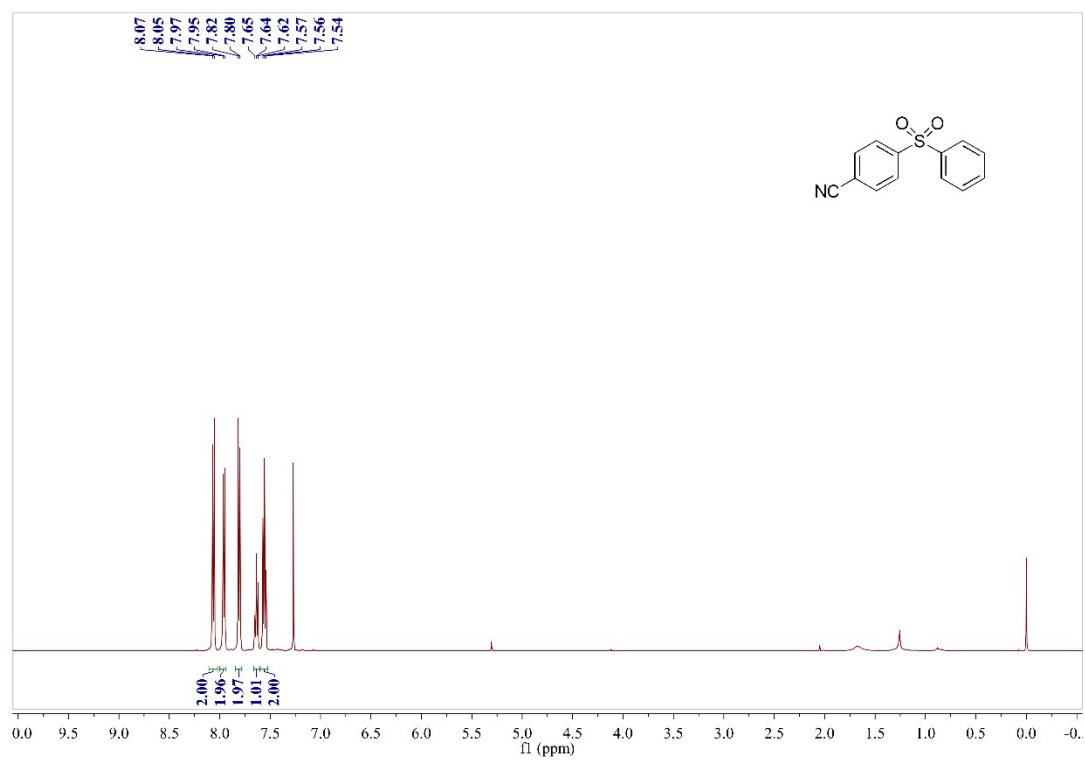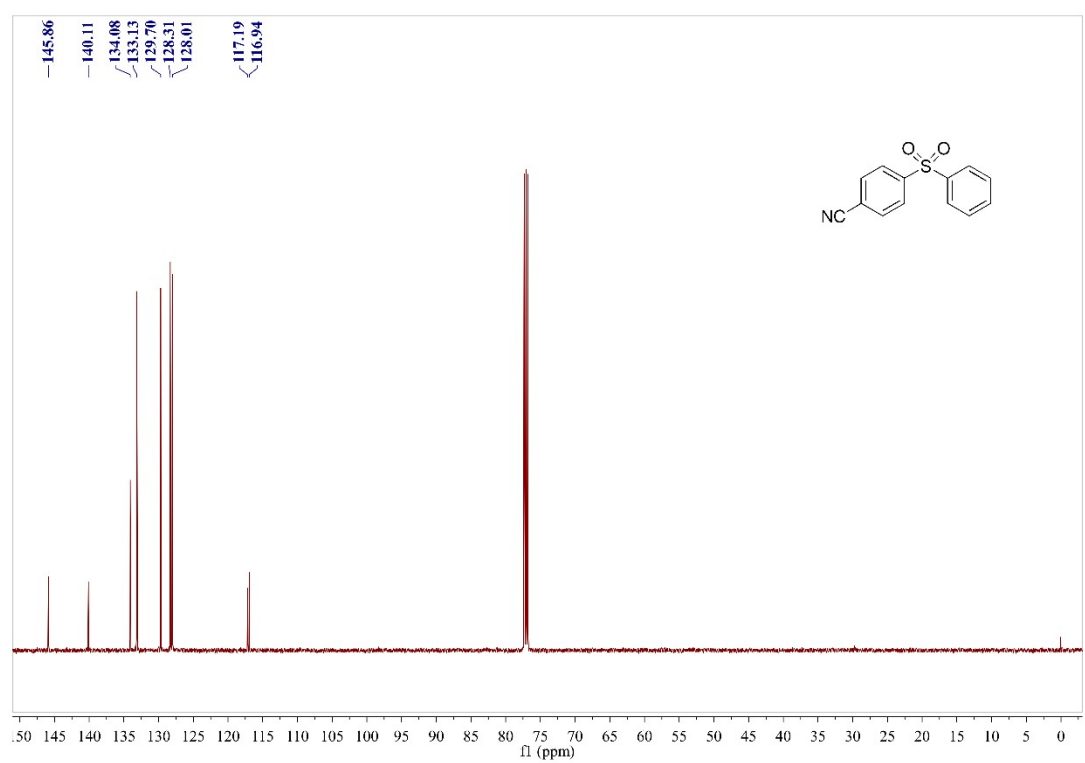

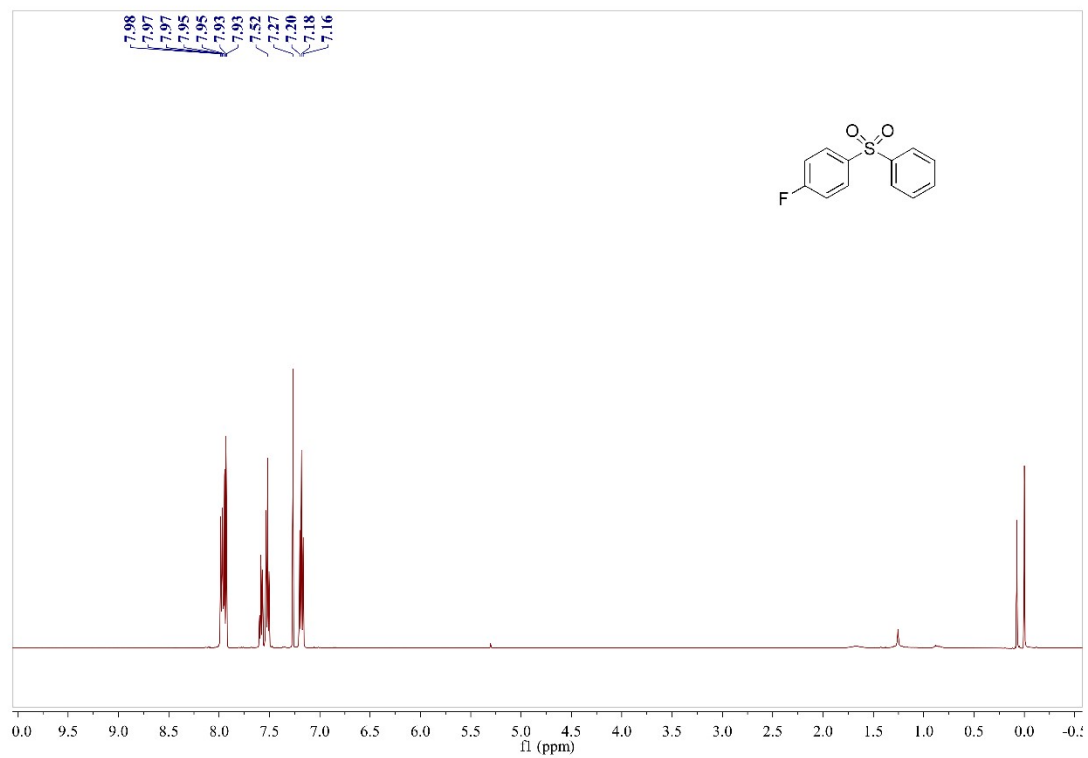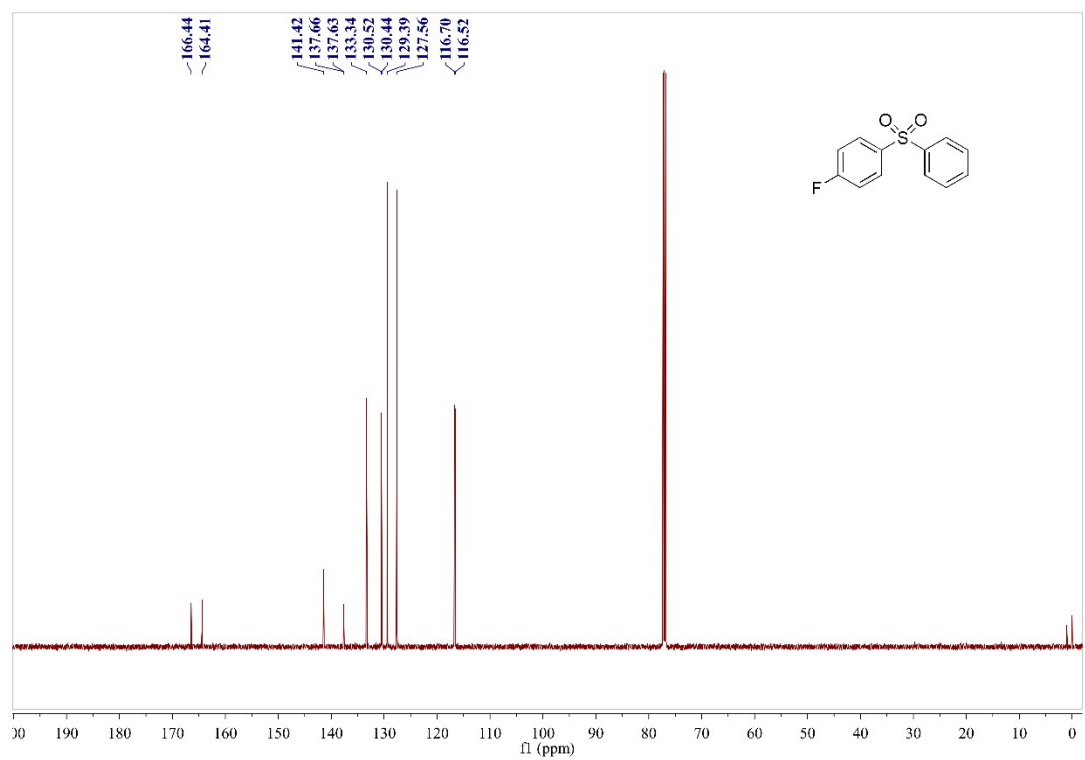

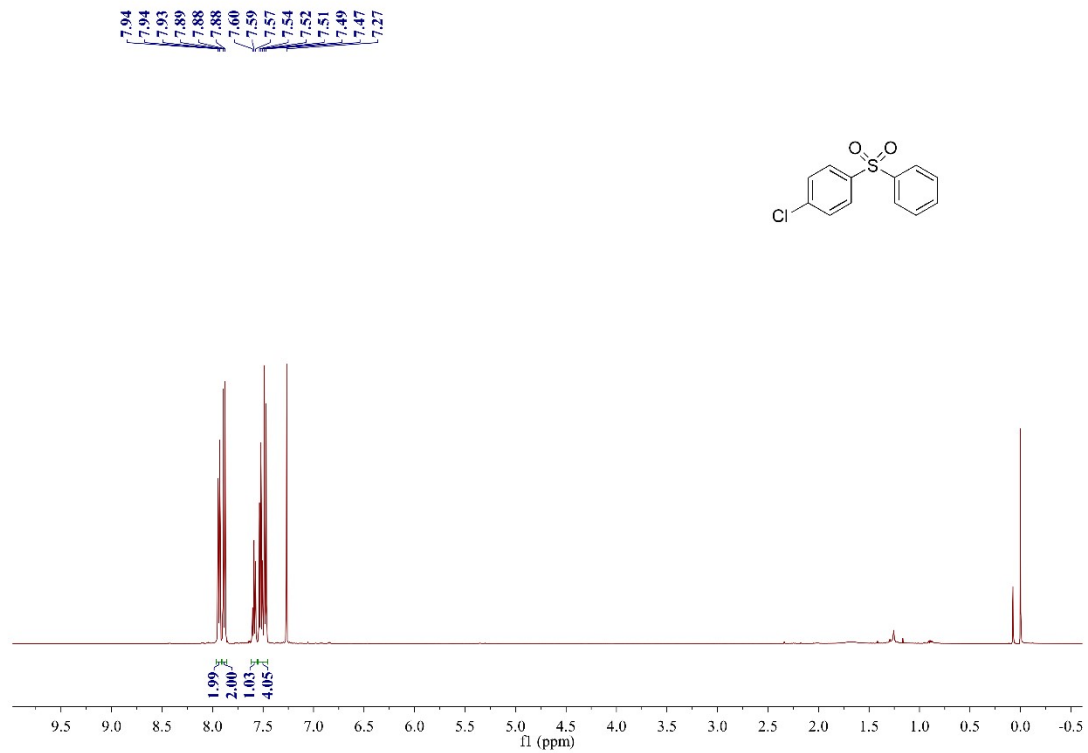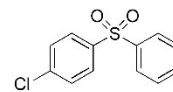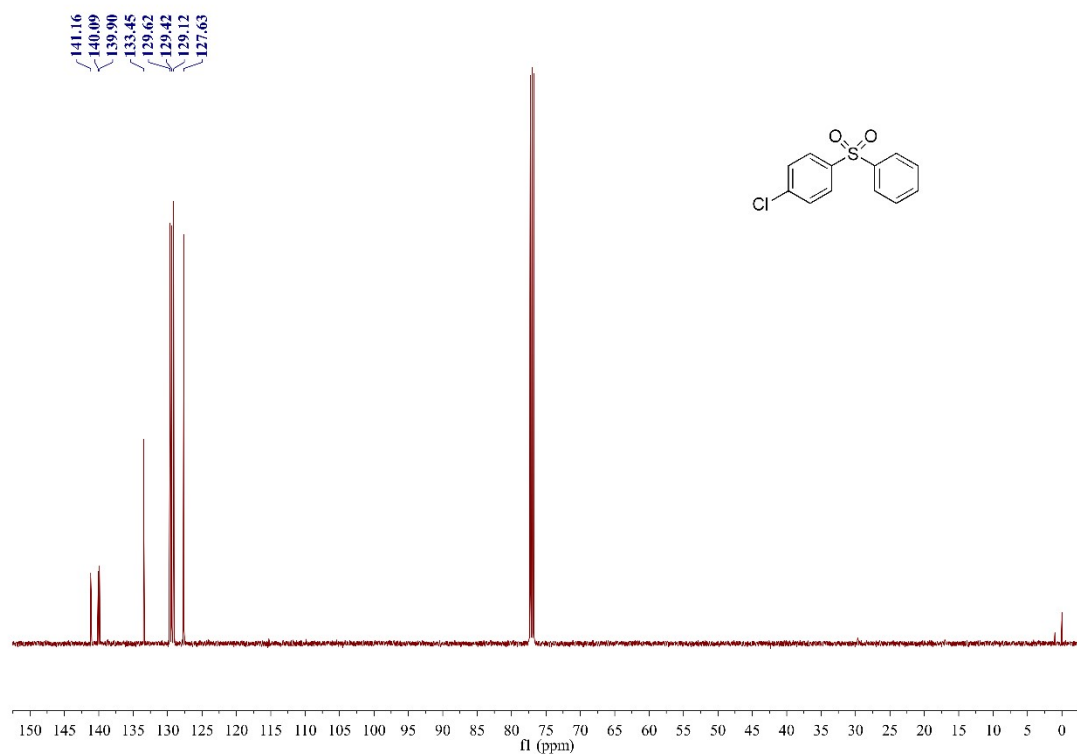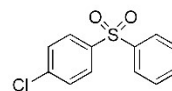

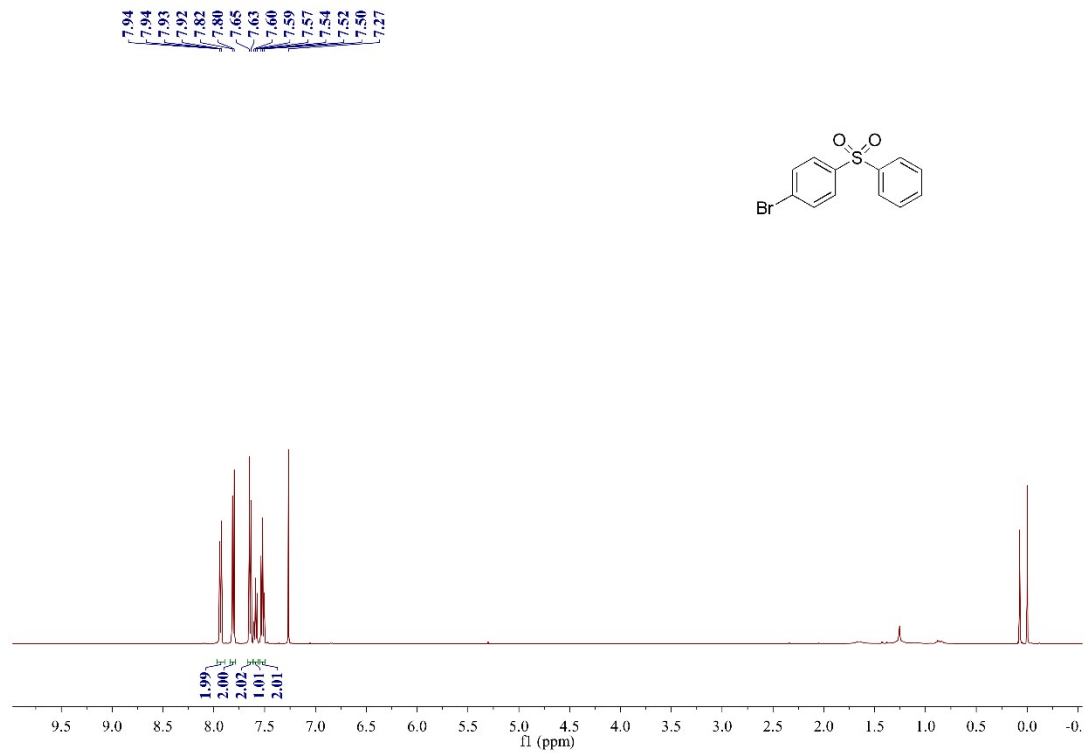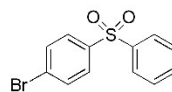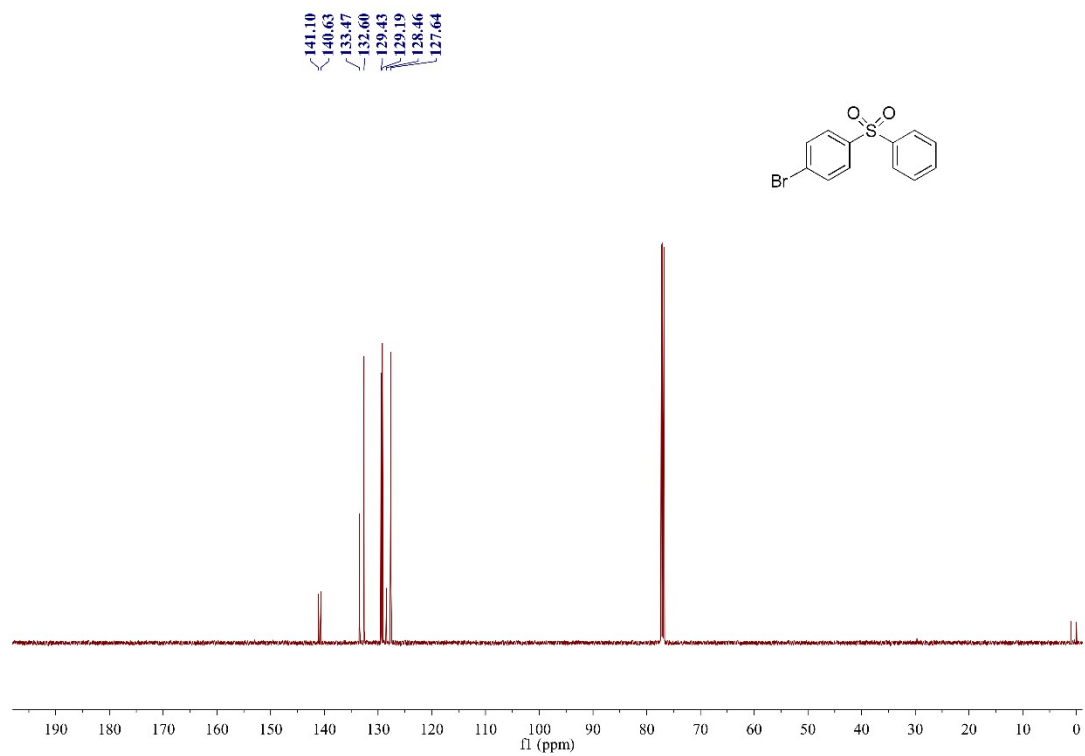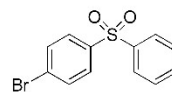

8.09  
8.07  
7.98  
7.96  
7.78  
7.77  
7.63  
7.62  
7.60  
7.56  
7.55  
7.53

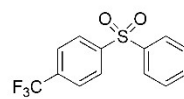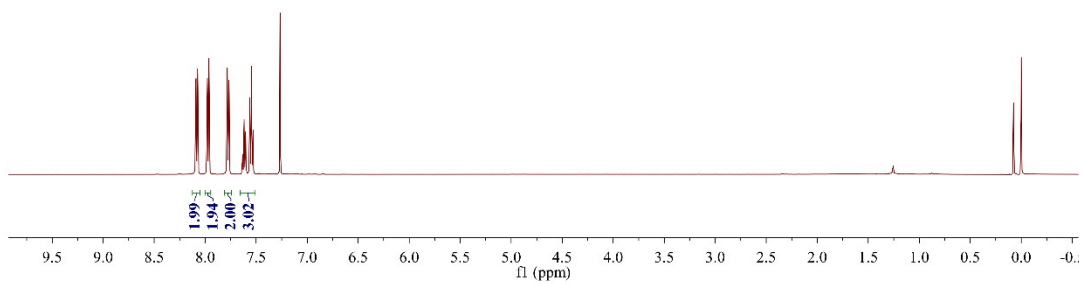

145.18  
140.54  
135.23  
134.97  
134.71  
134.44  
133.81  
129.56  
128.21  
127.90  
126.51  
126.48  
126.45  
126.42  
126.35  
124.18  
122.01  
119.84

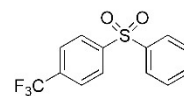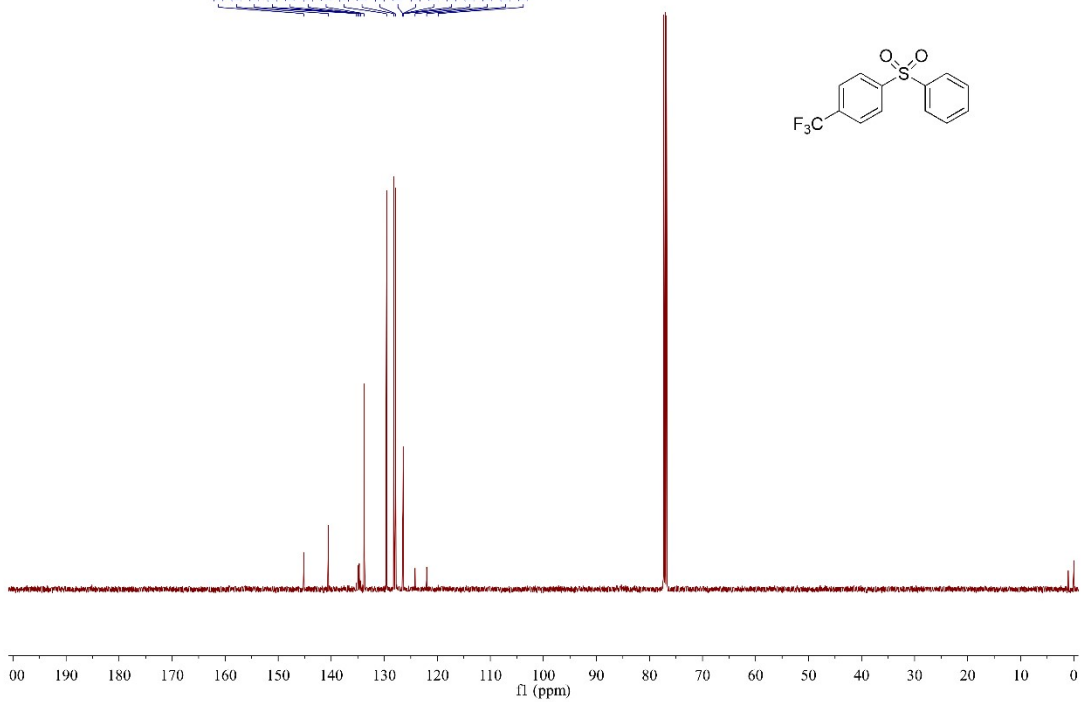

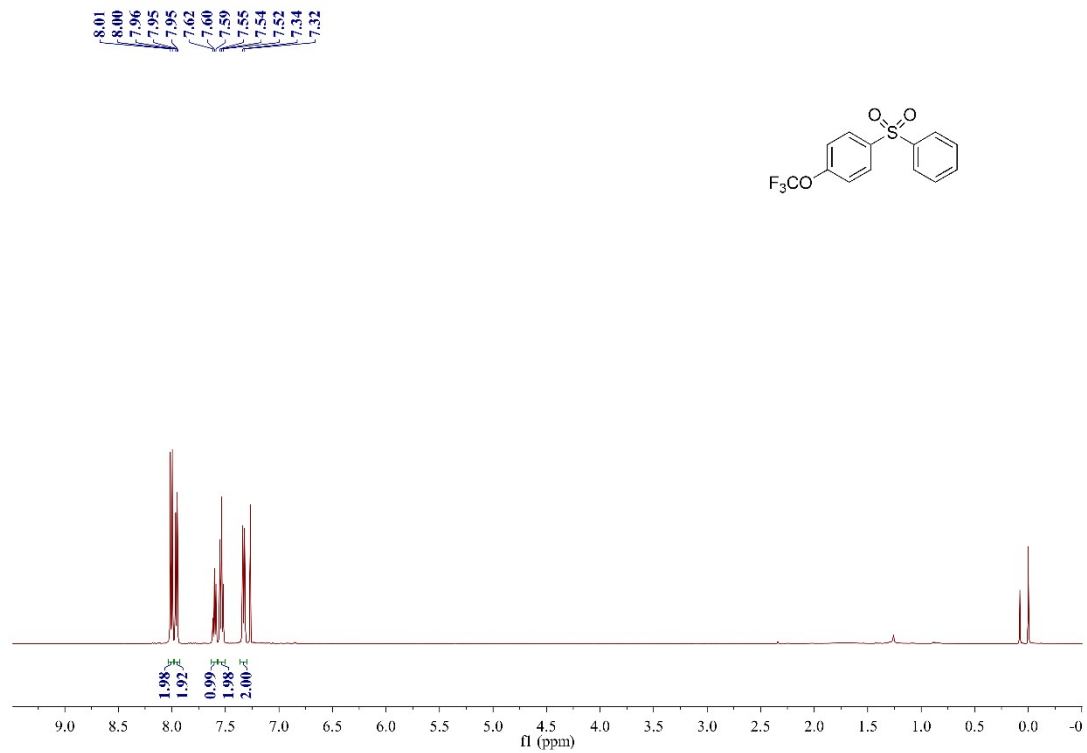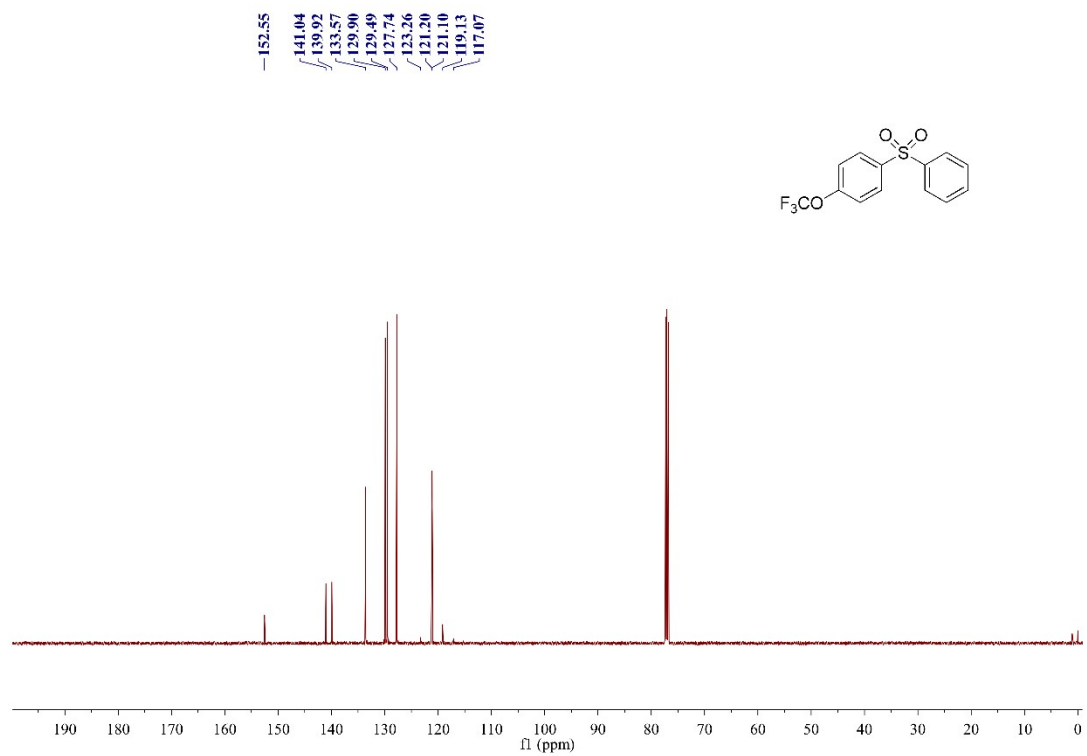



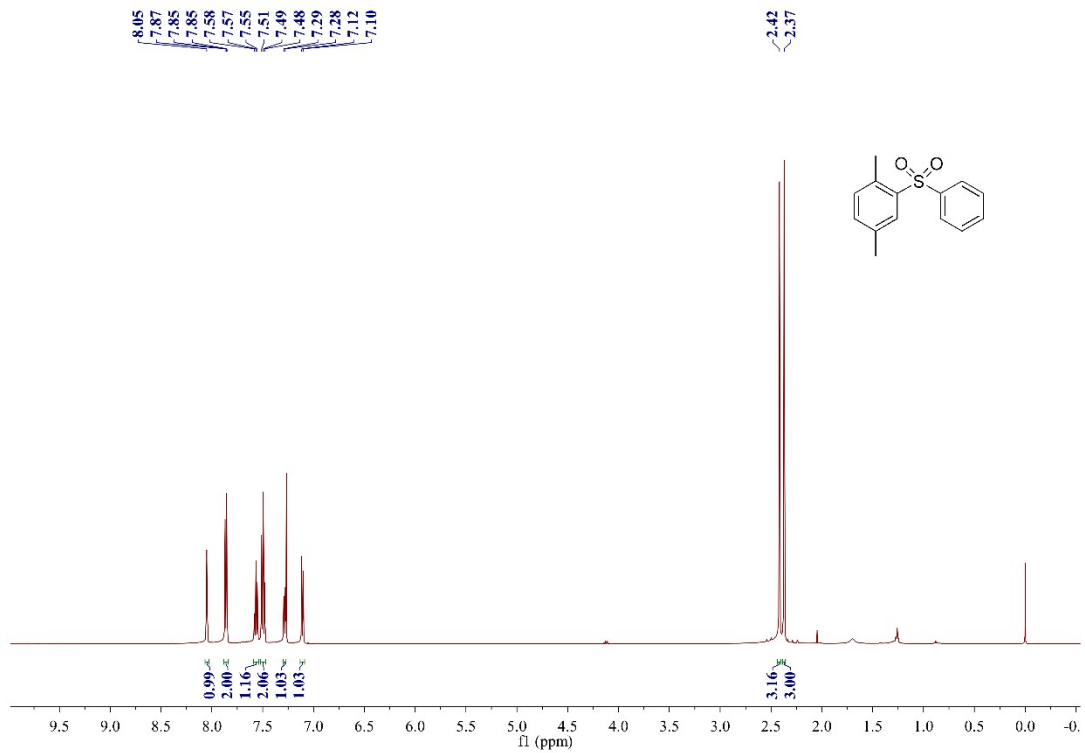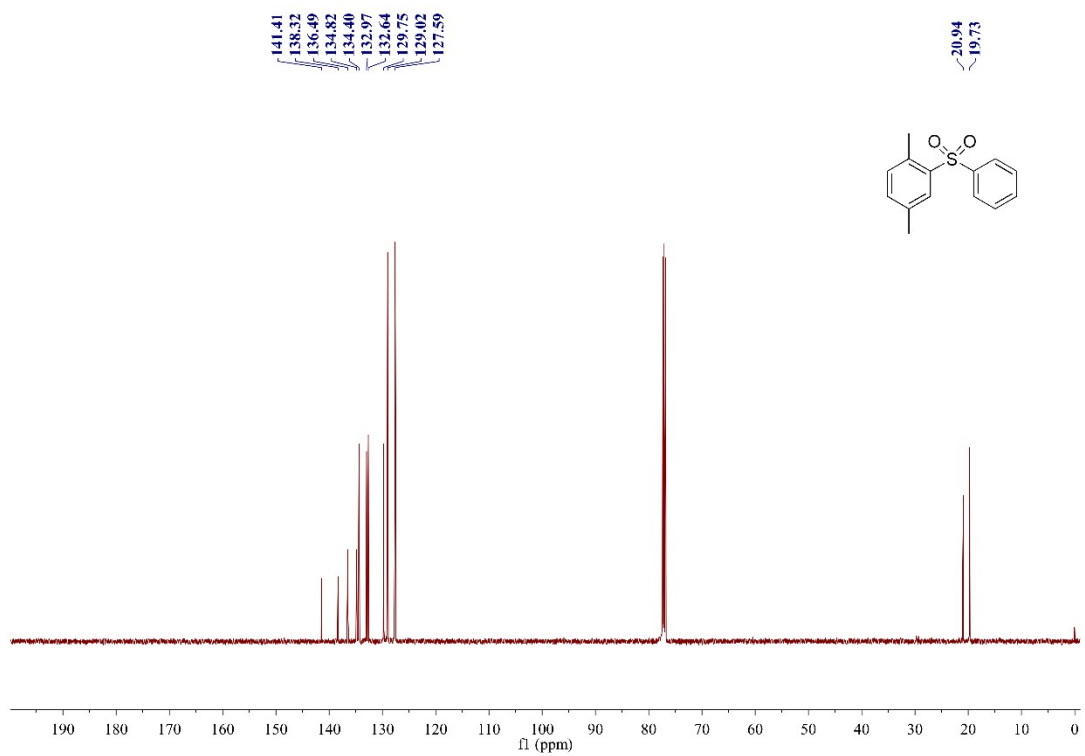

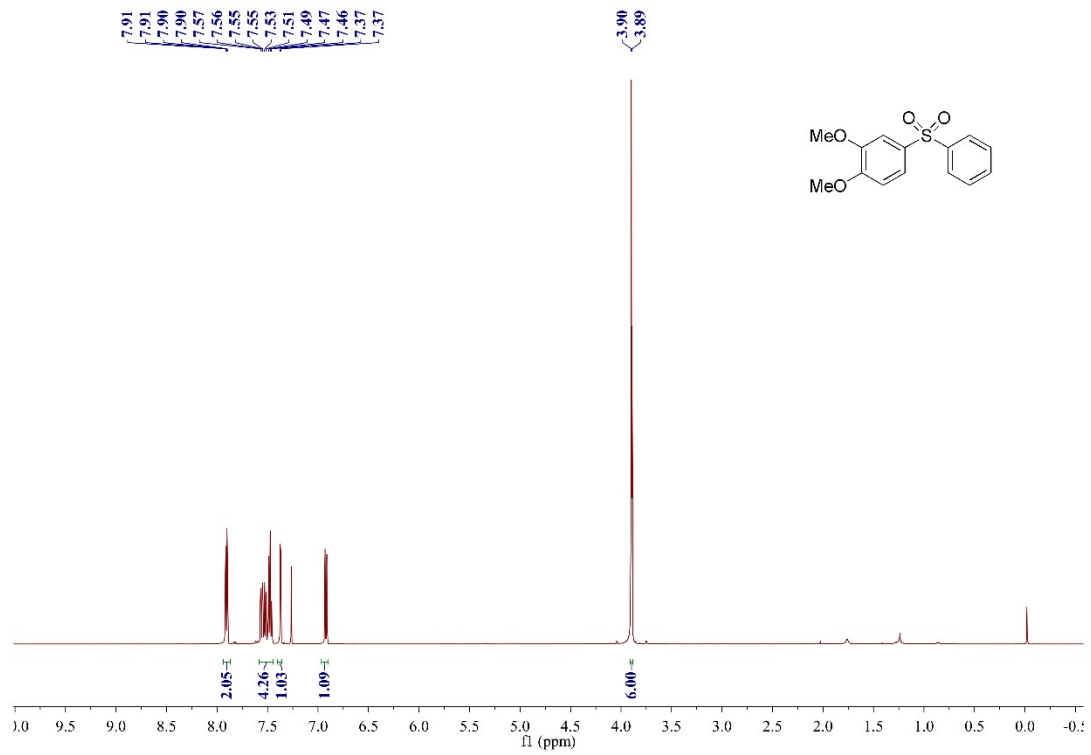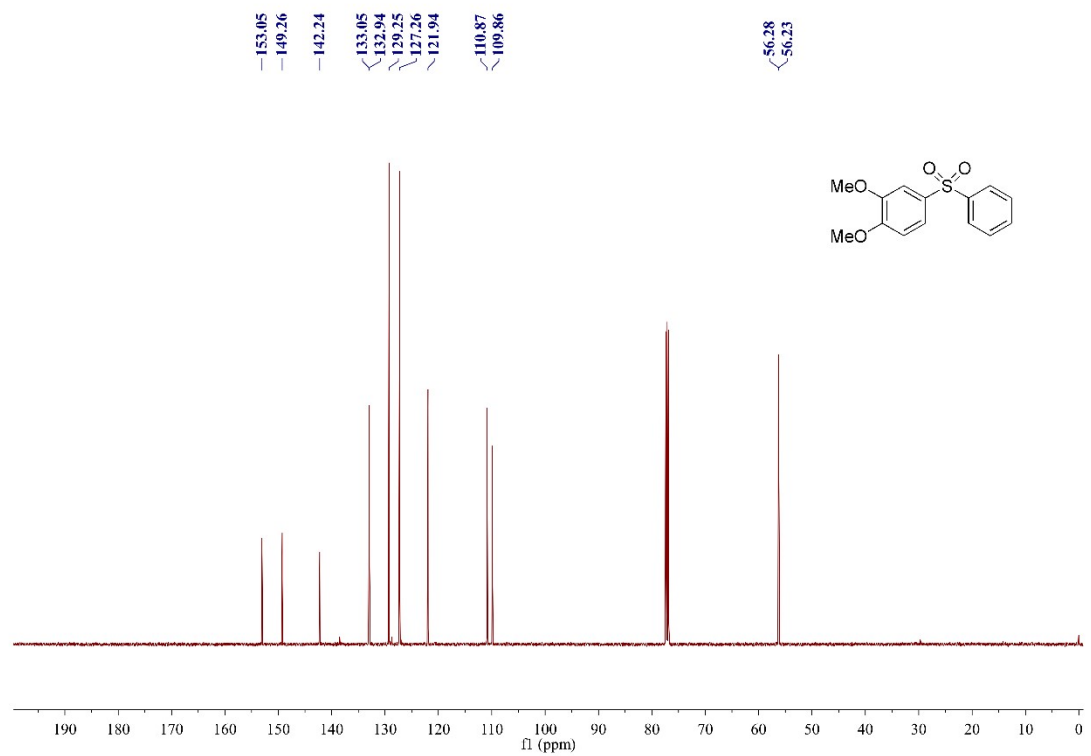

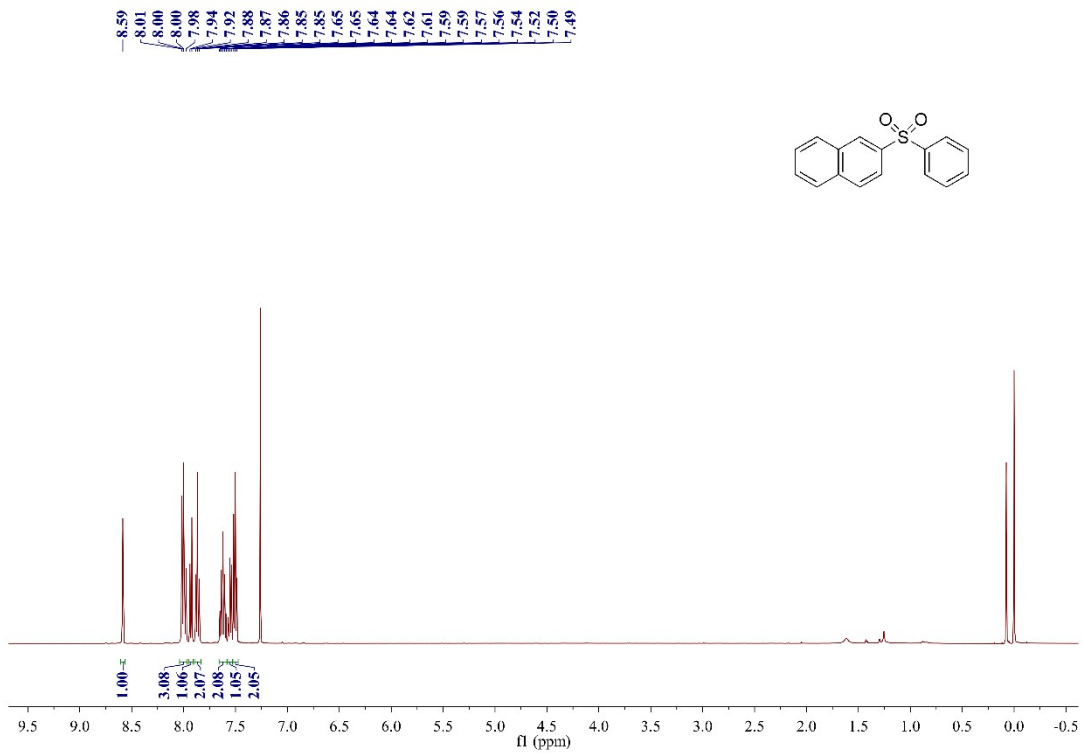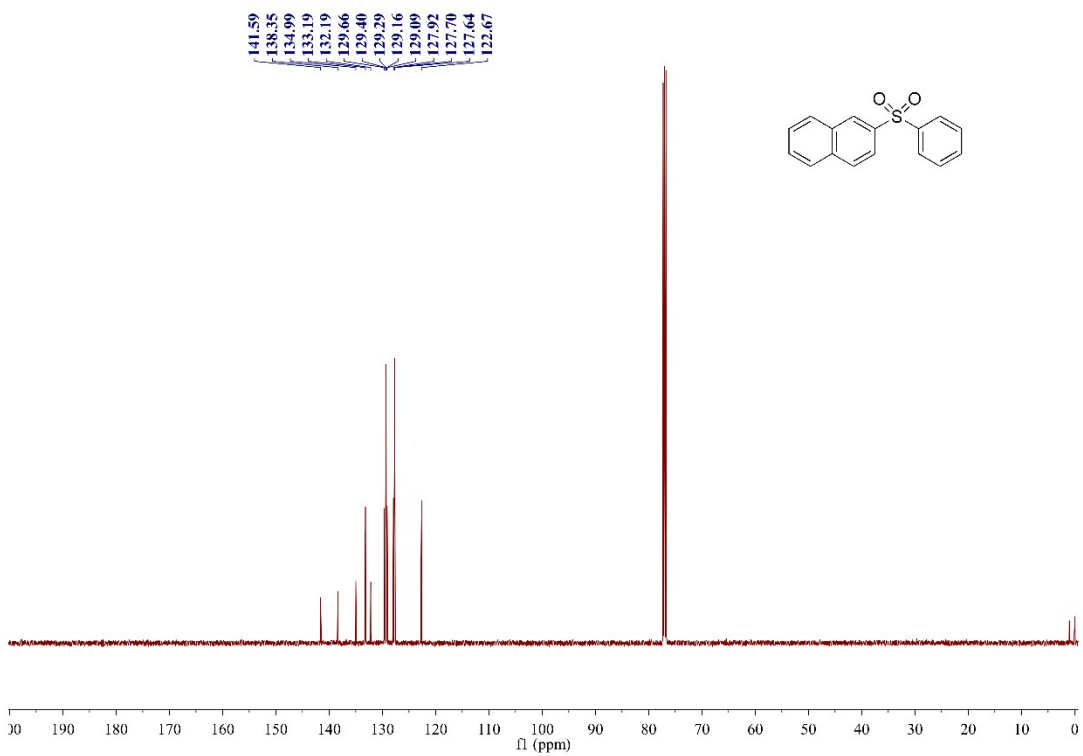

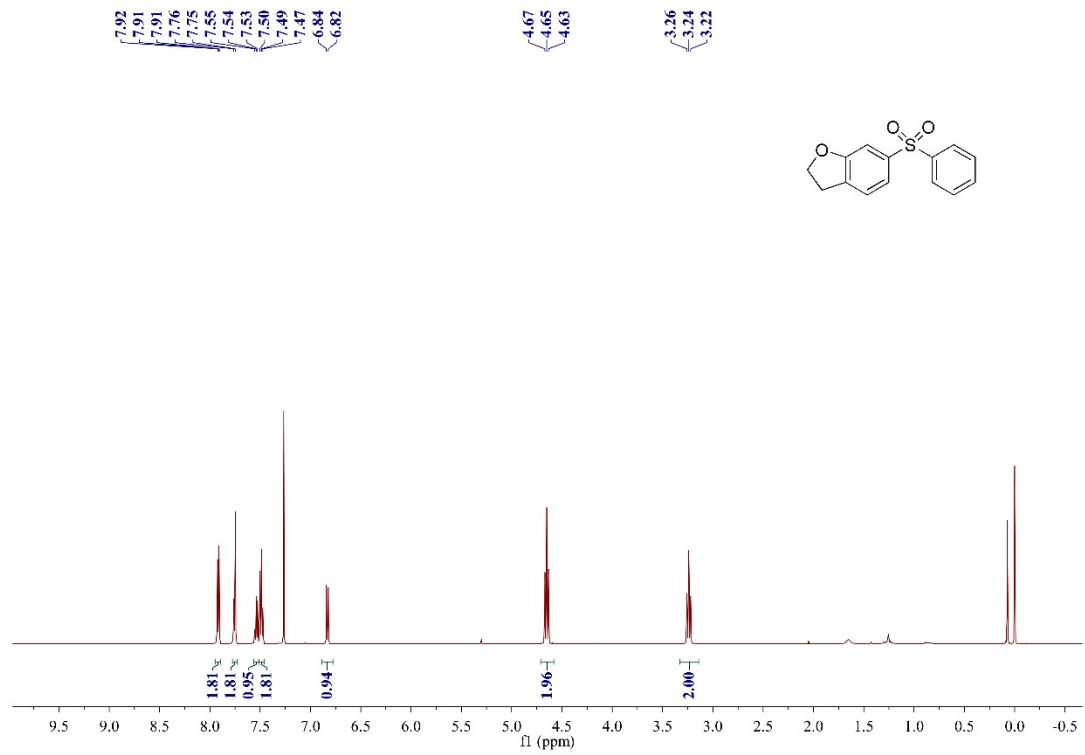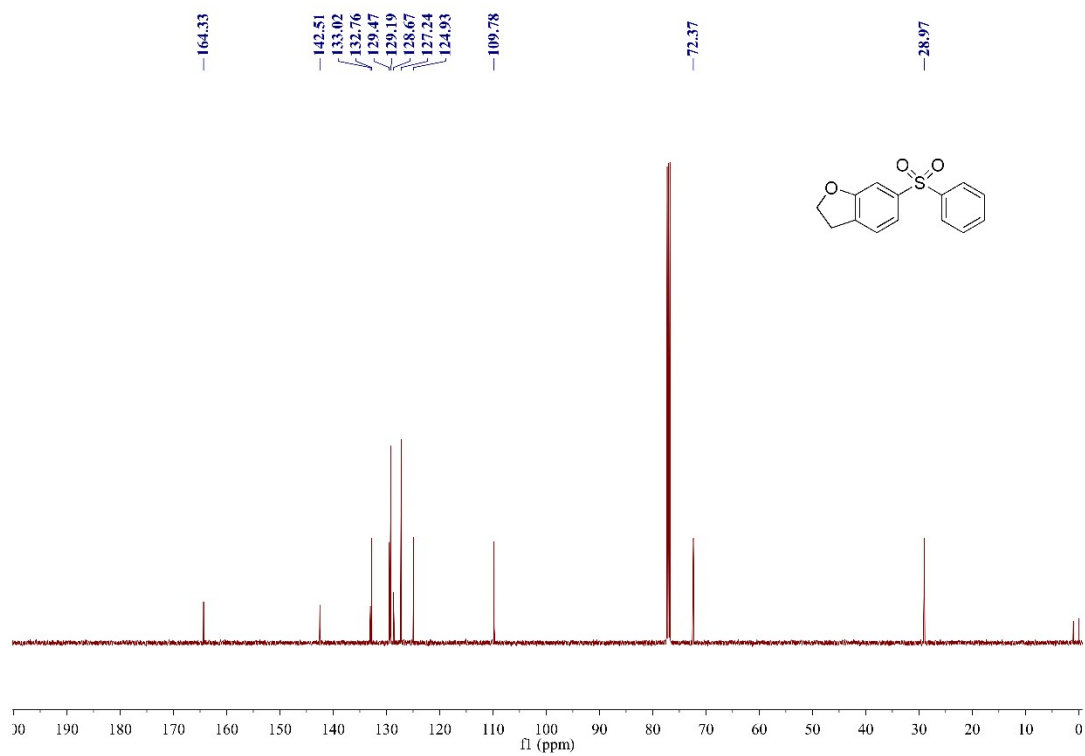

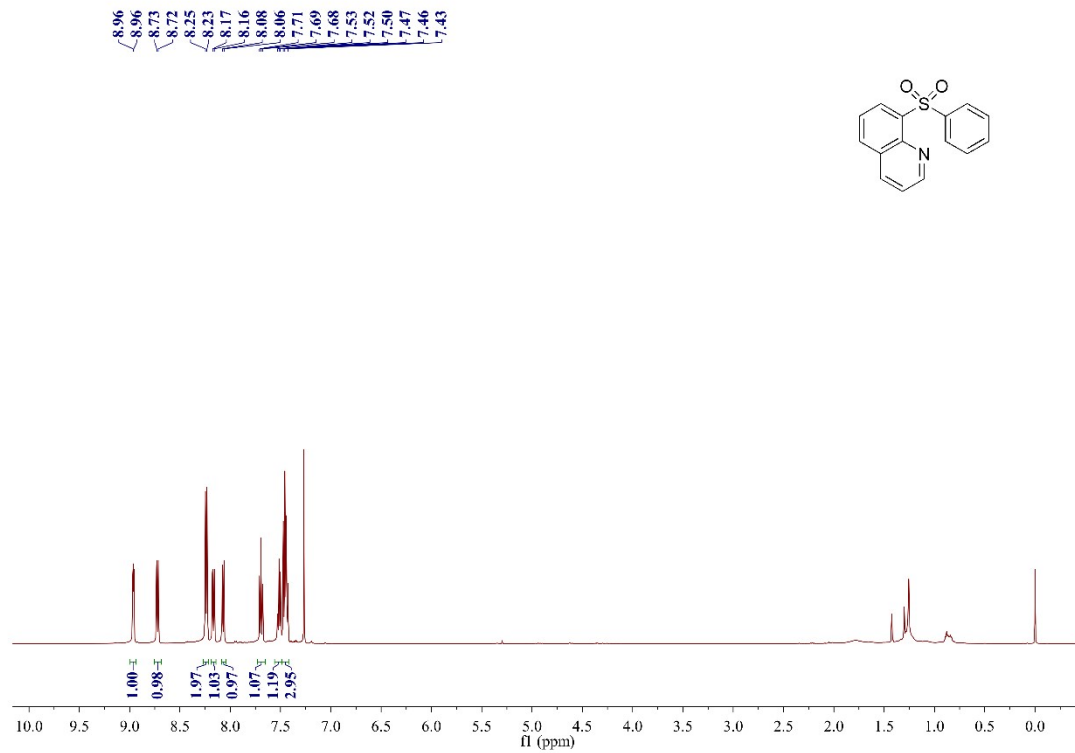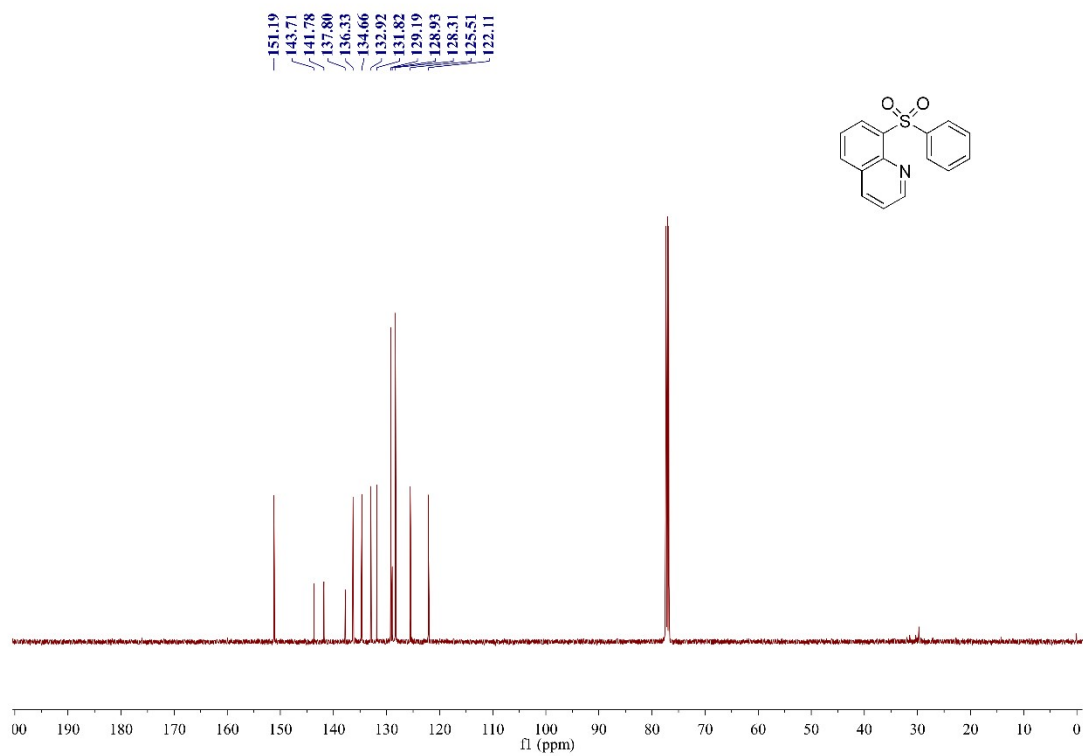

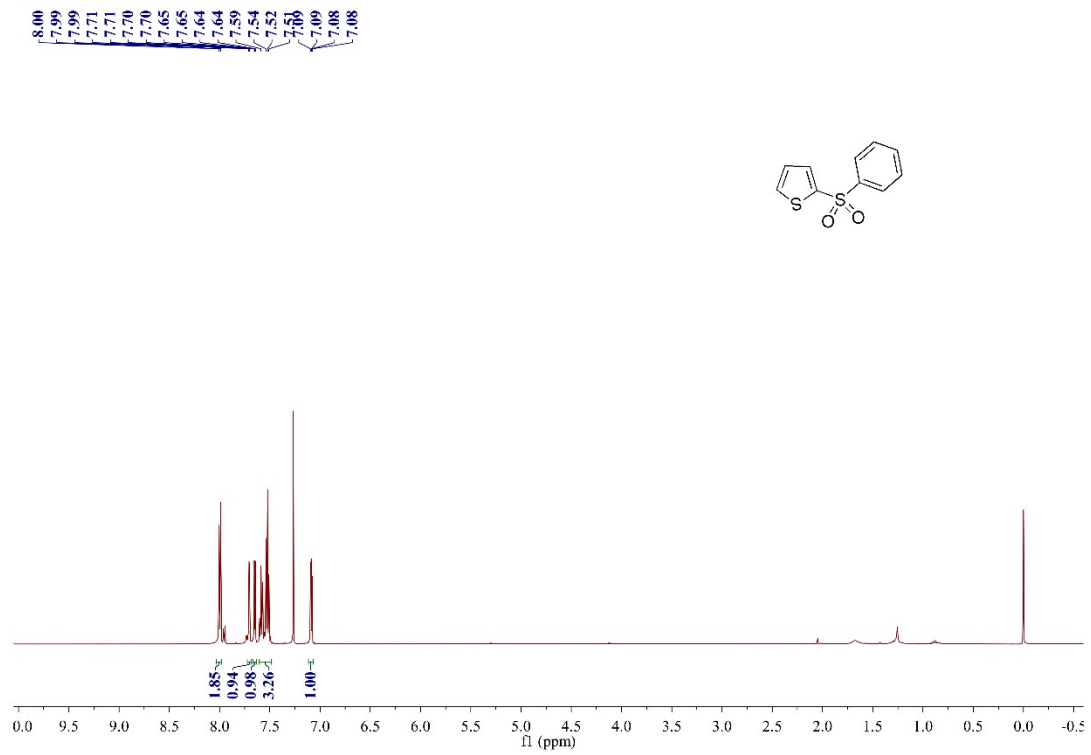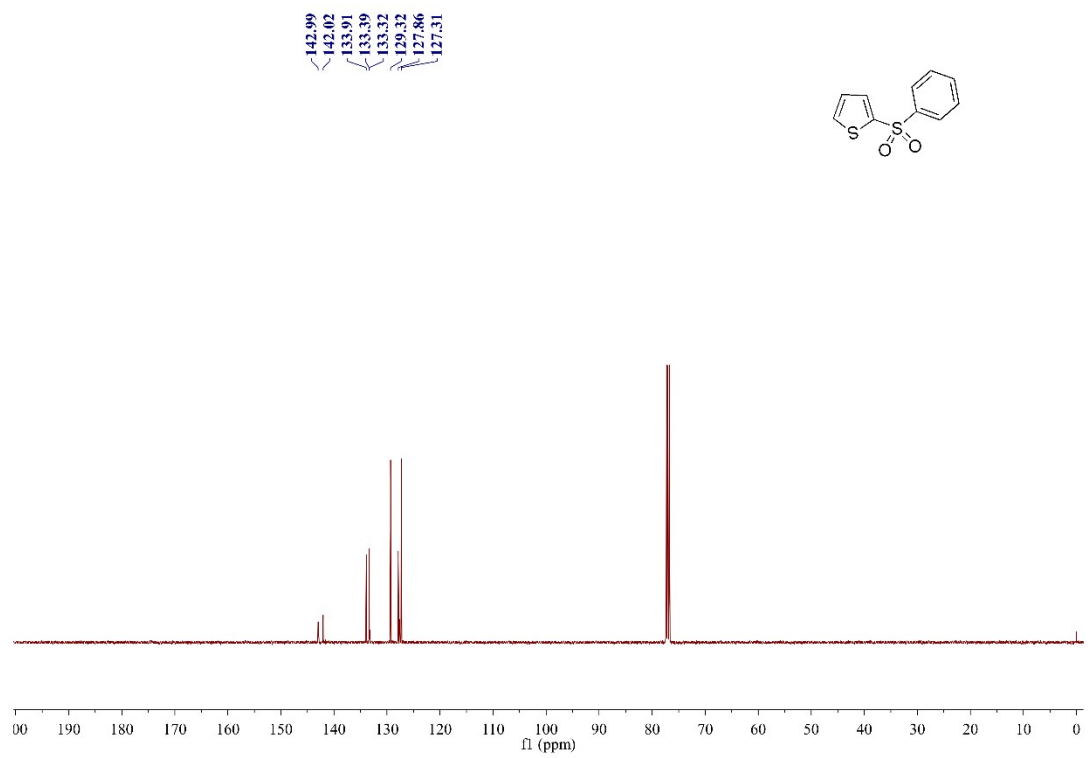

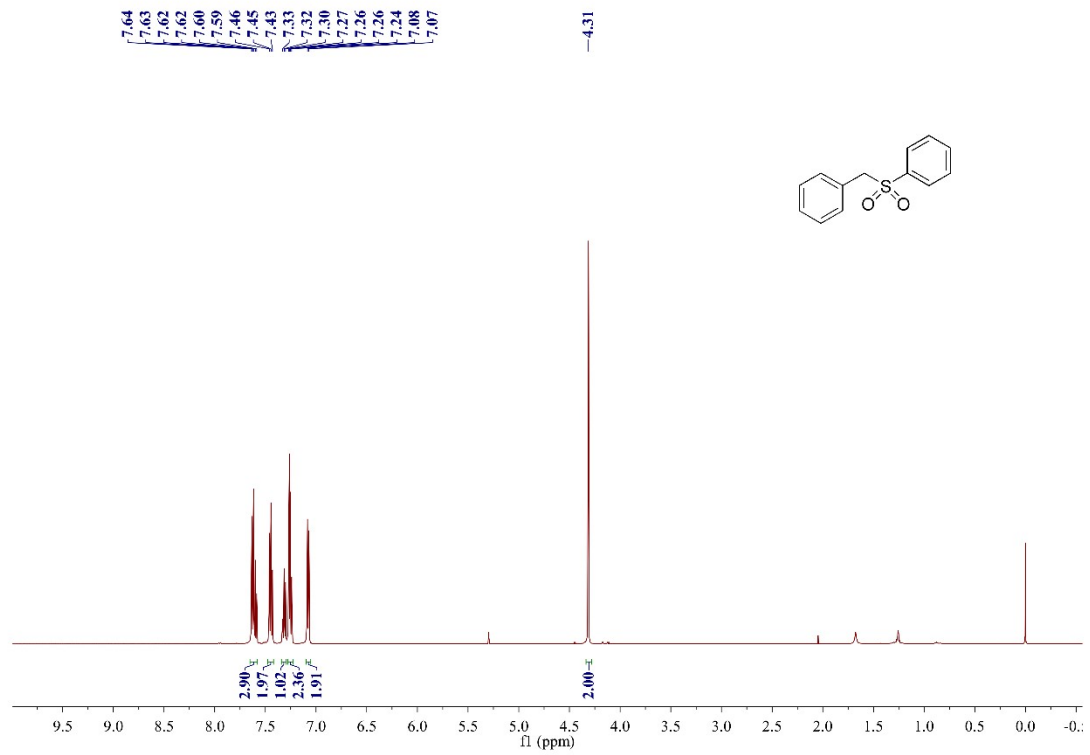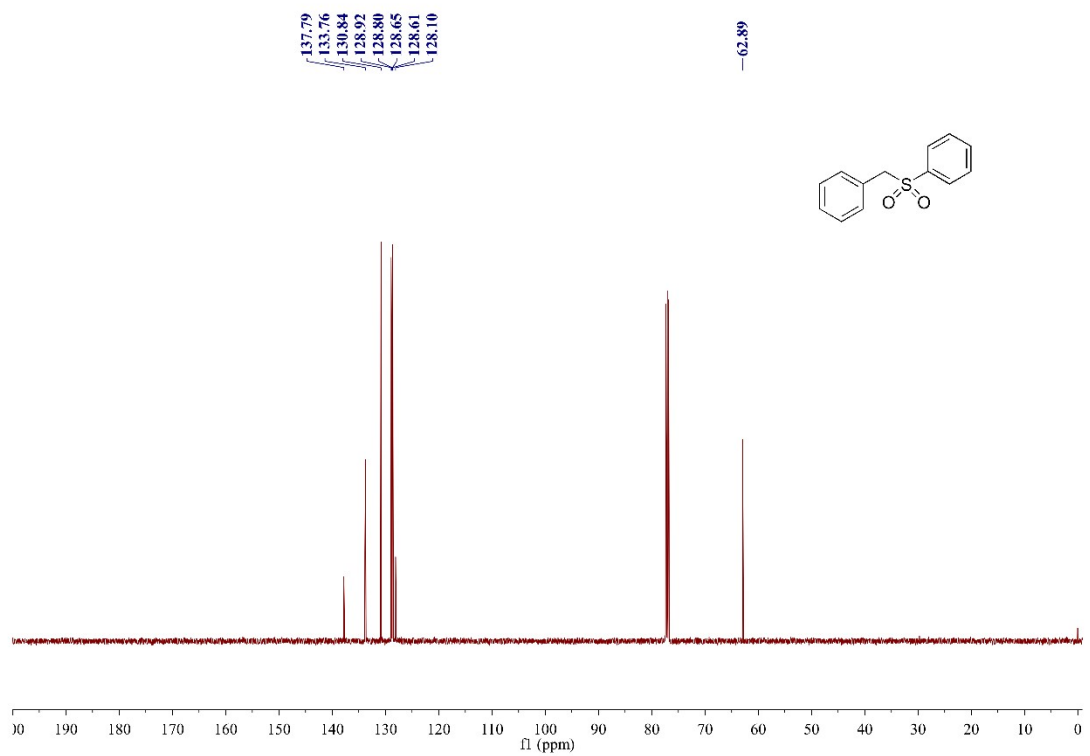

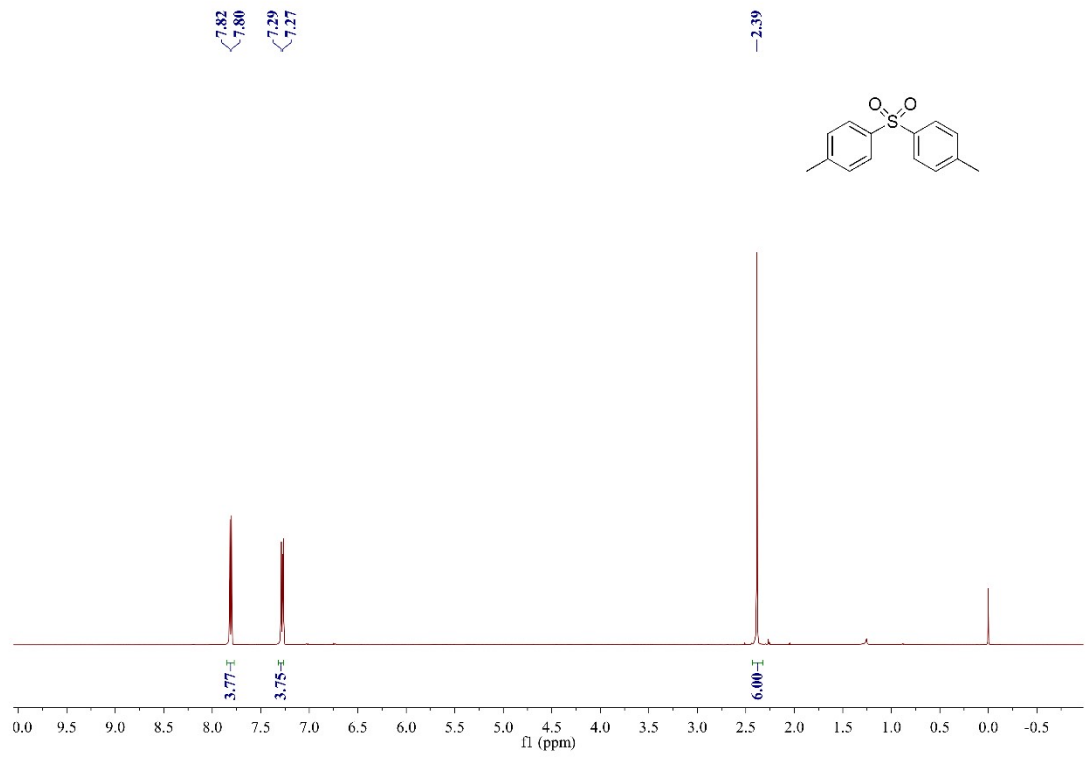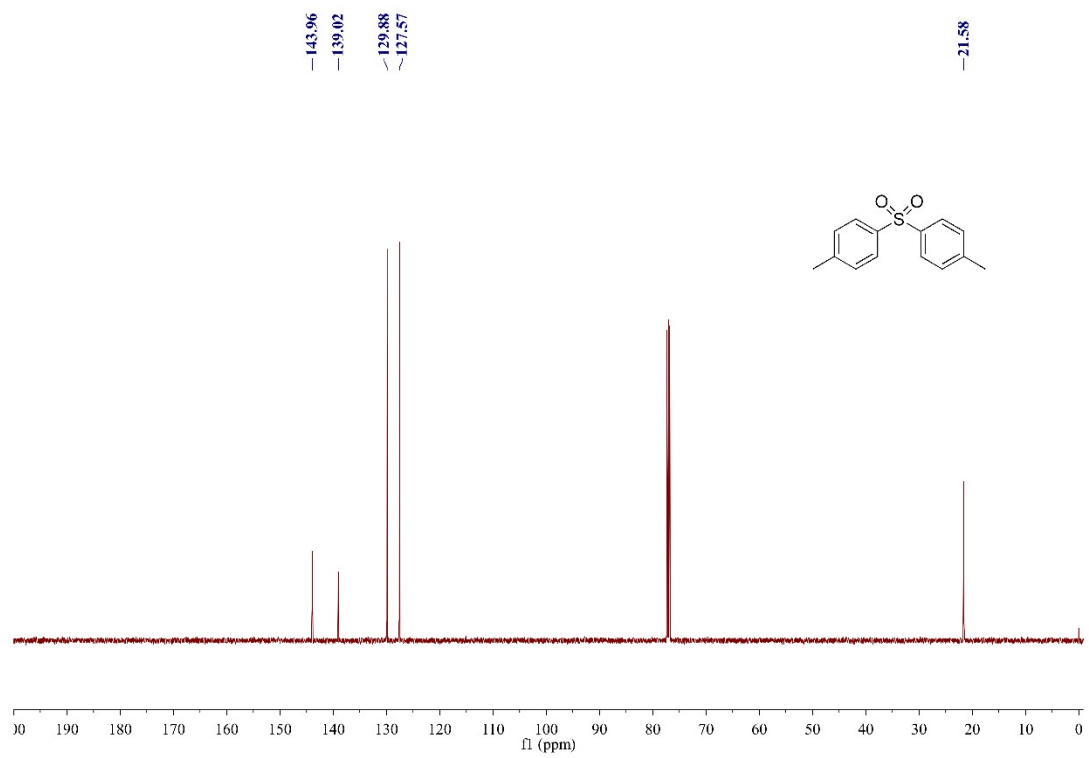



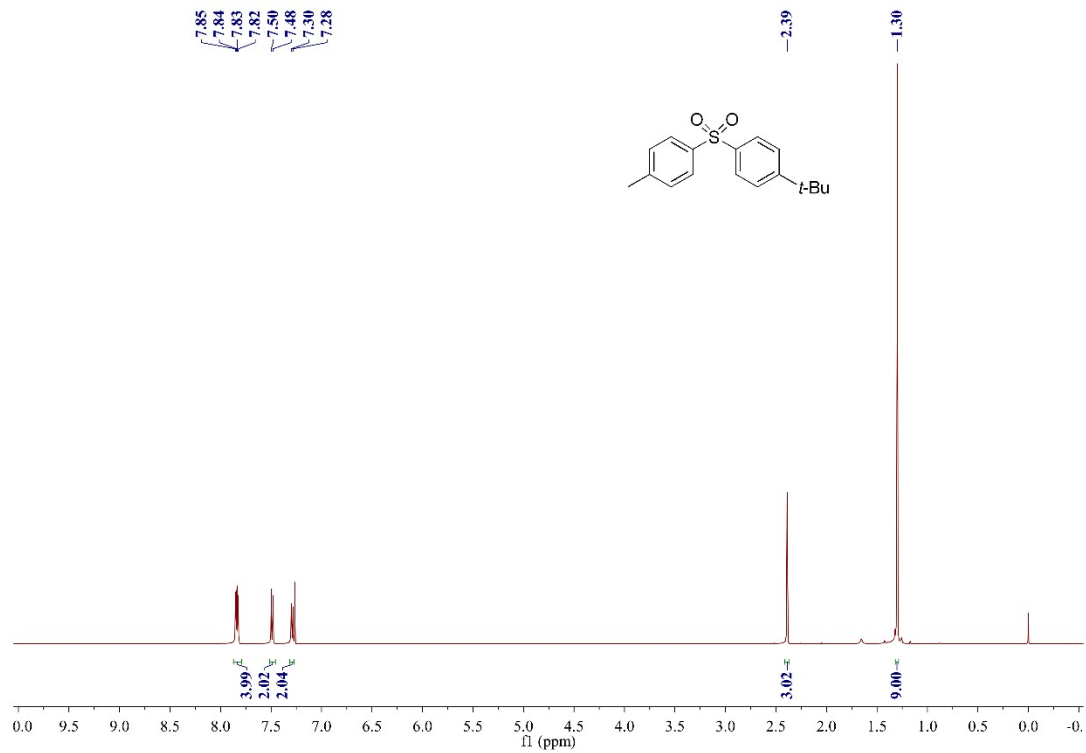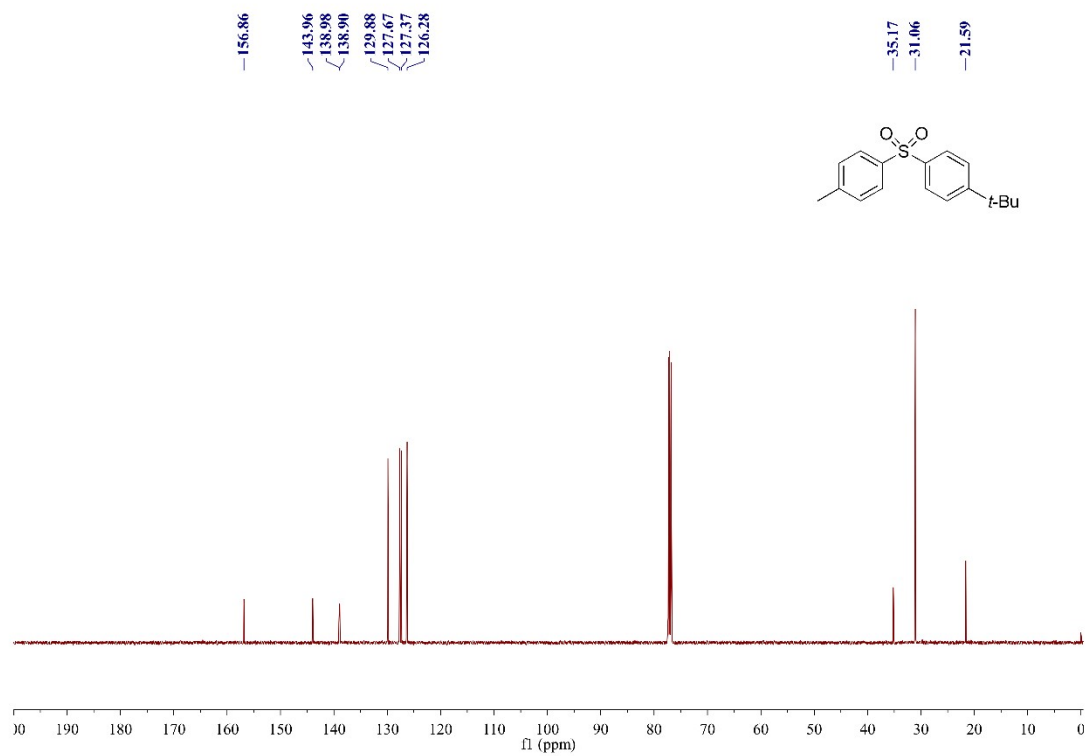

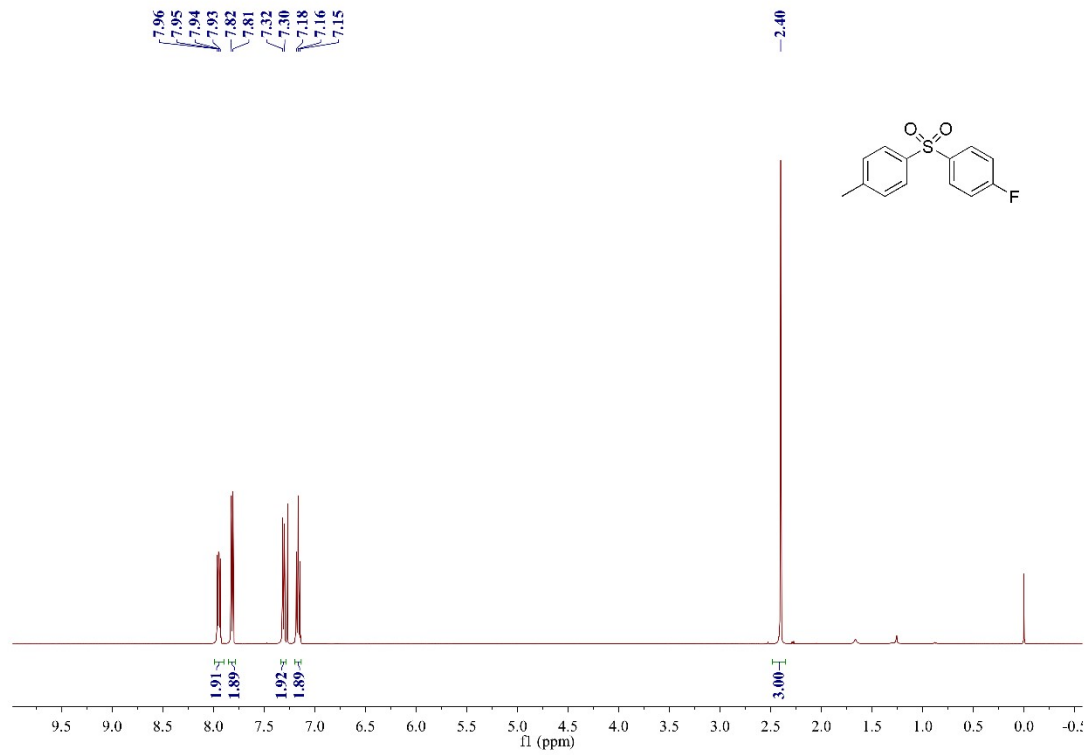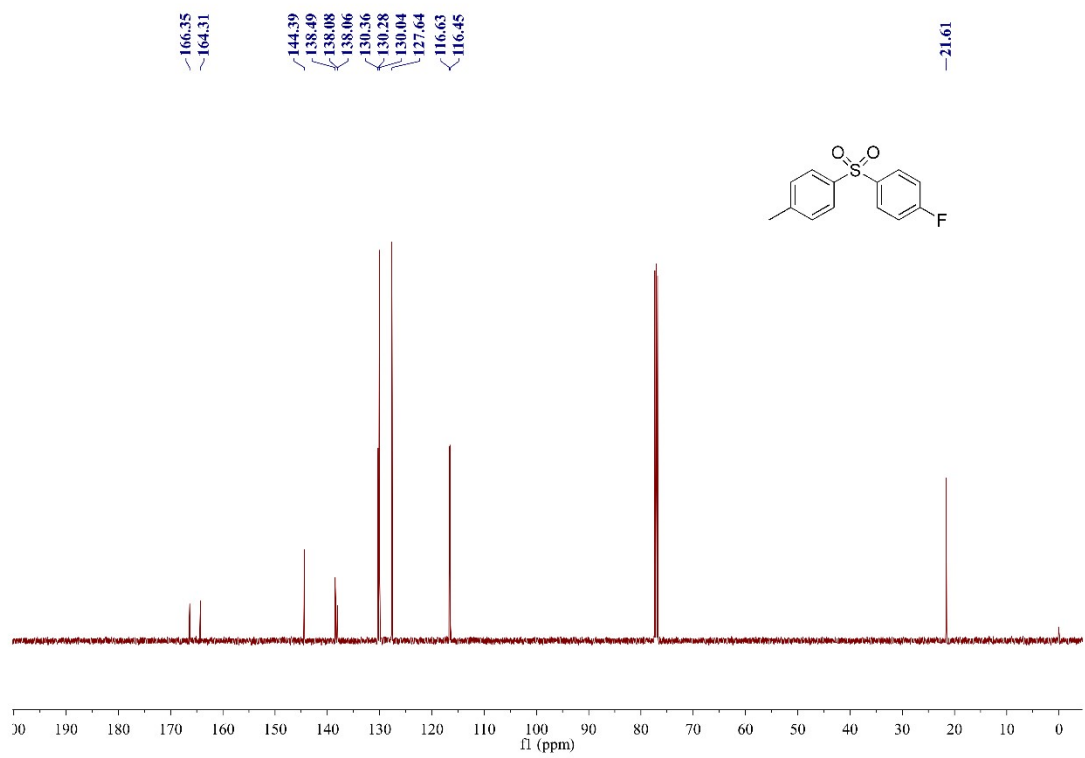

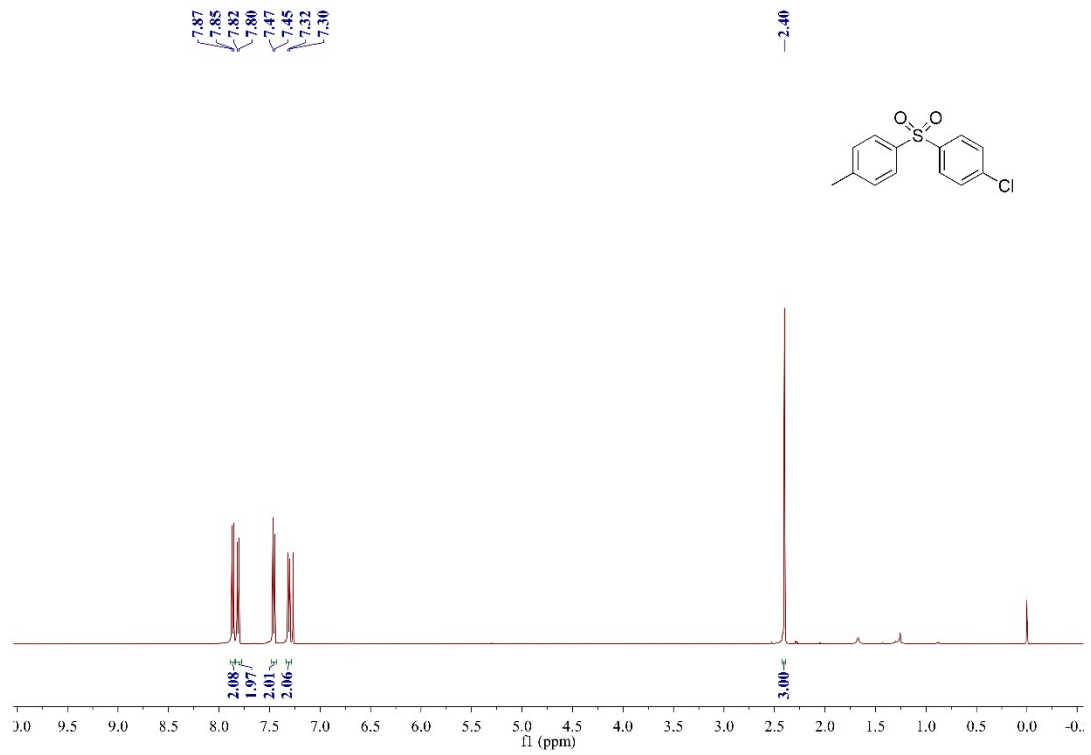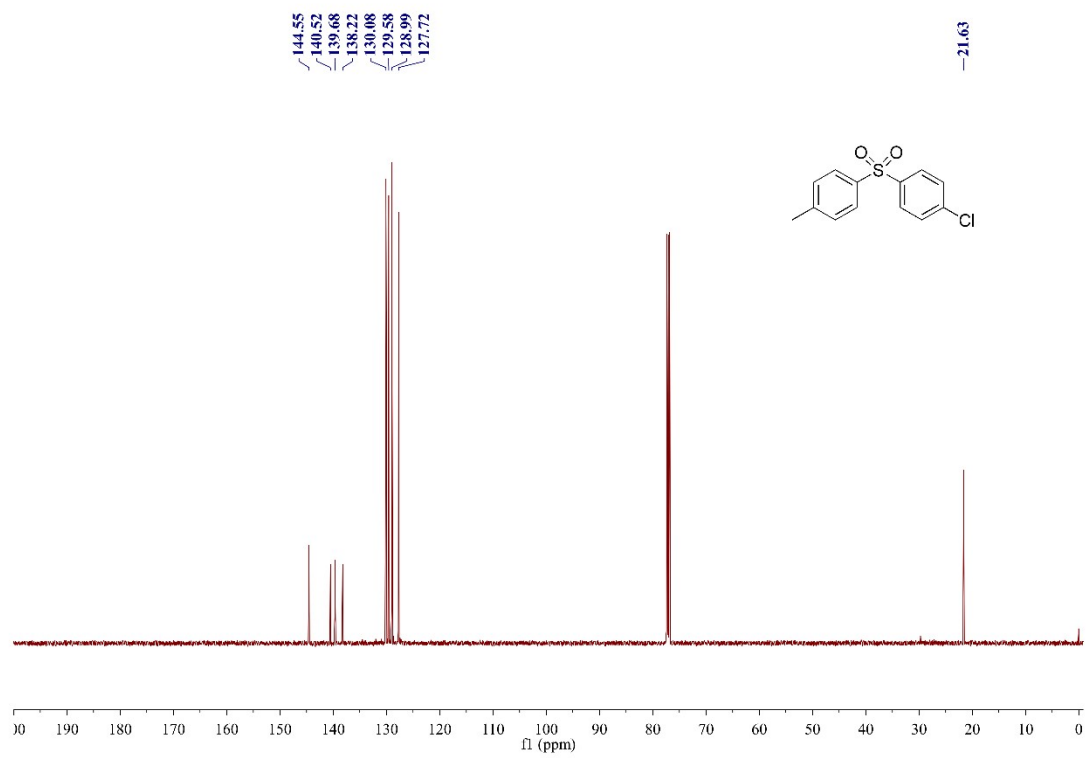

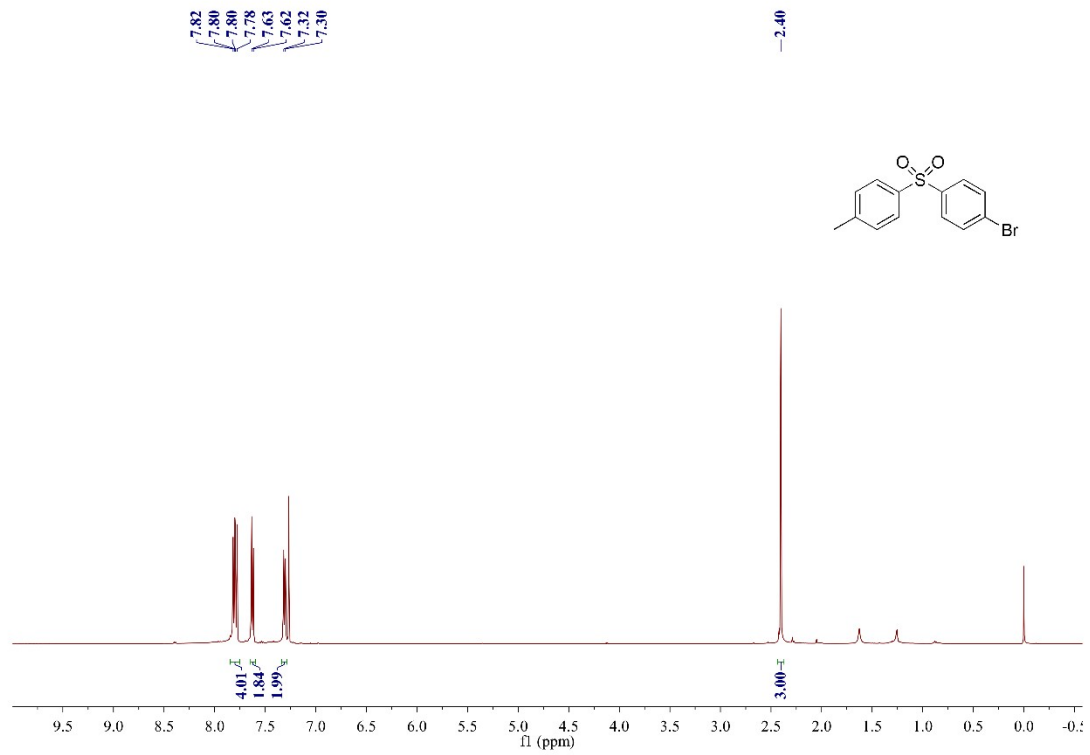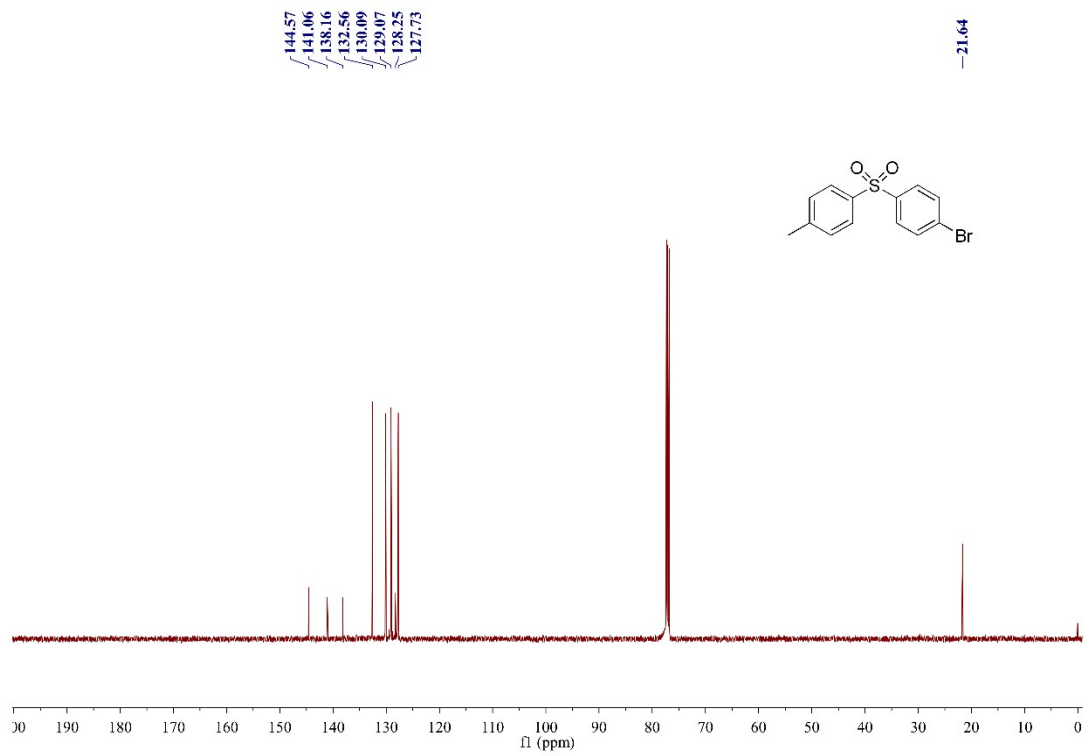

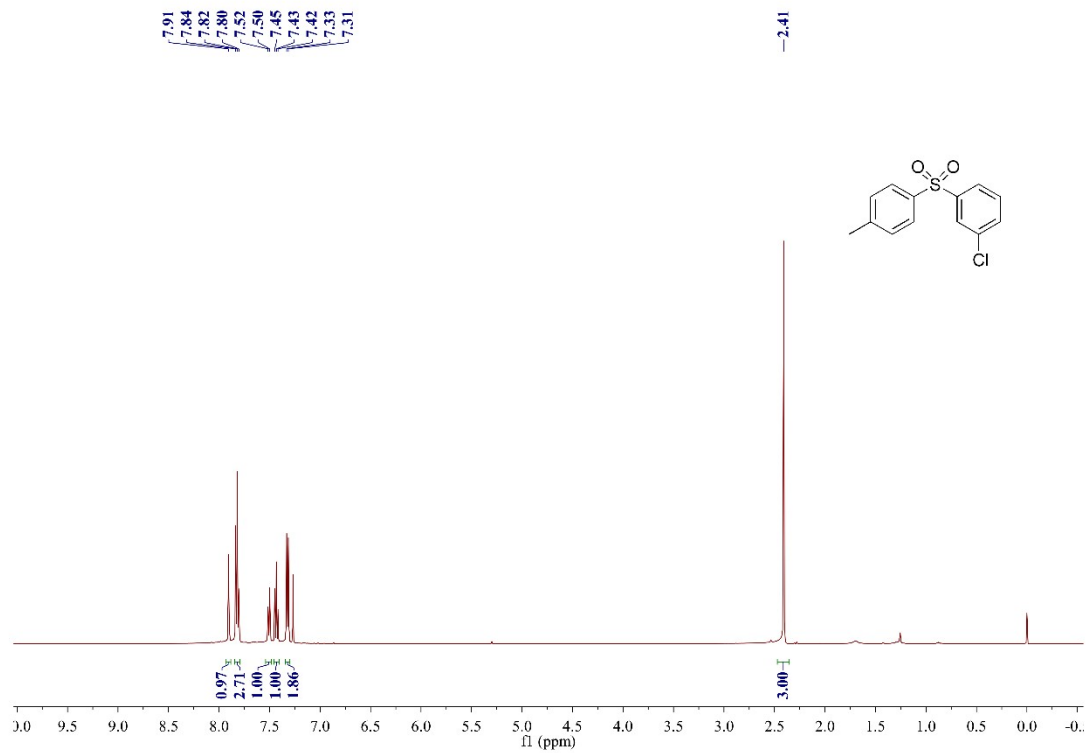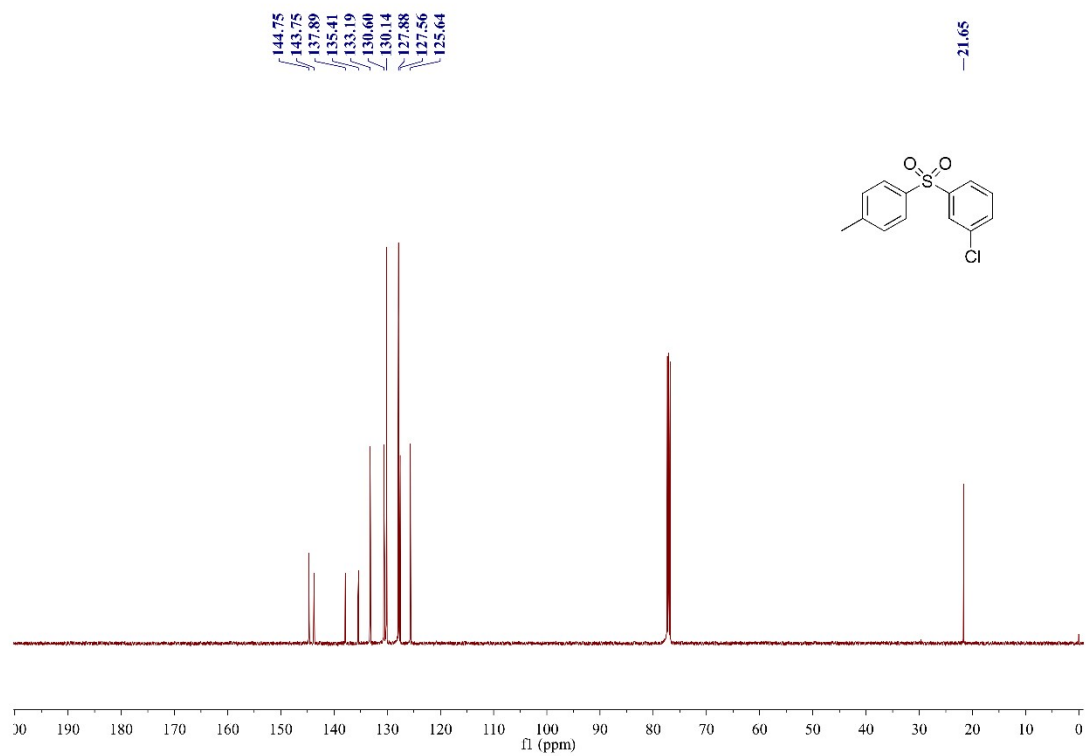

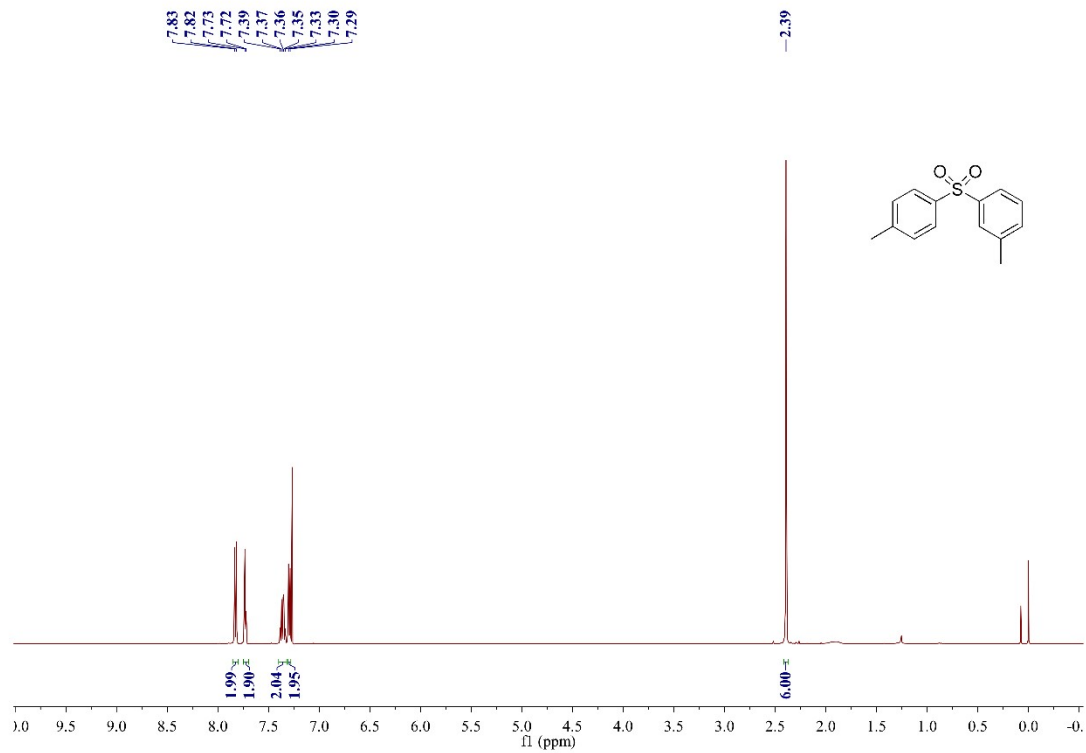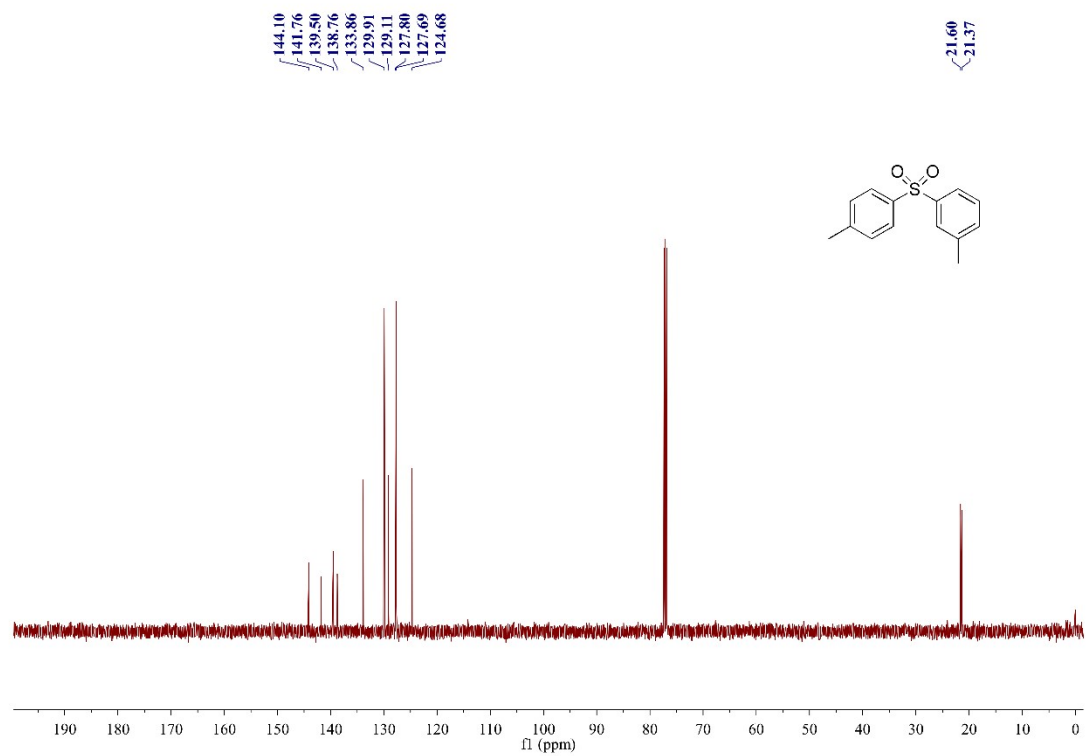

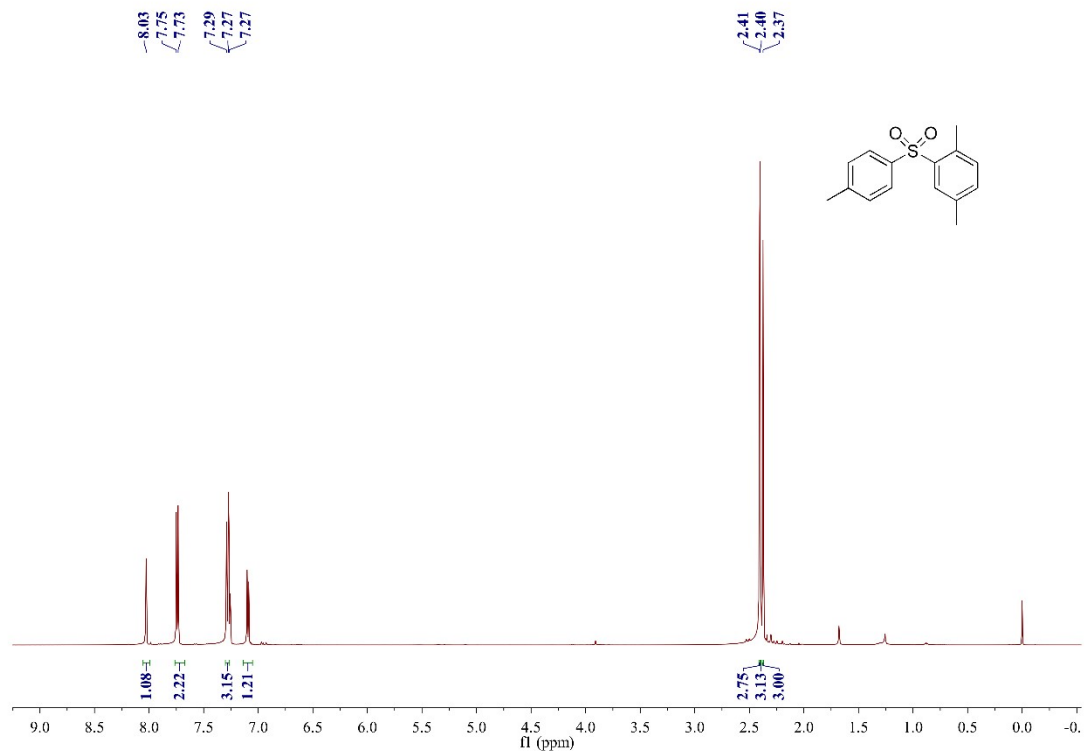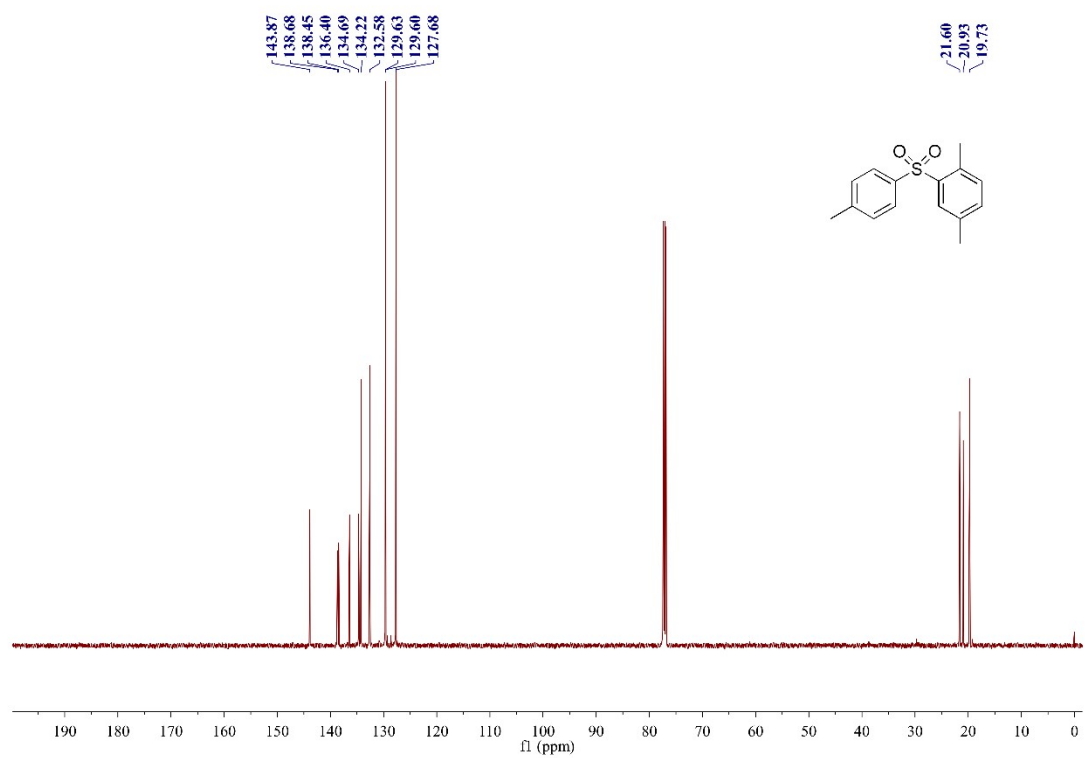

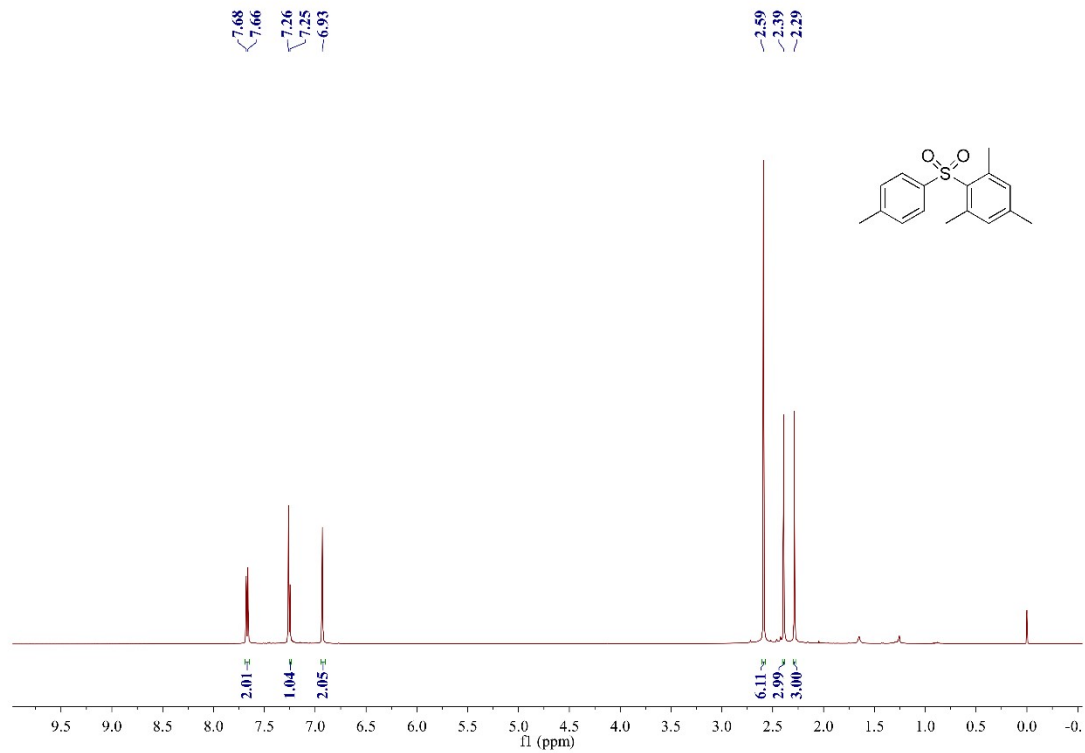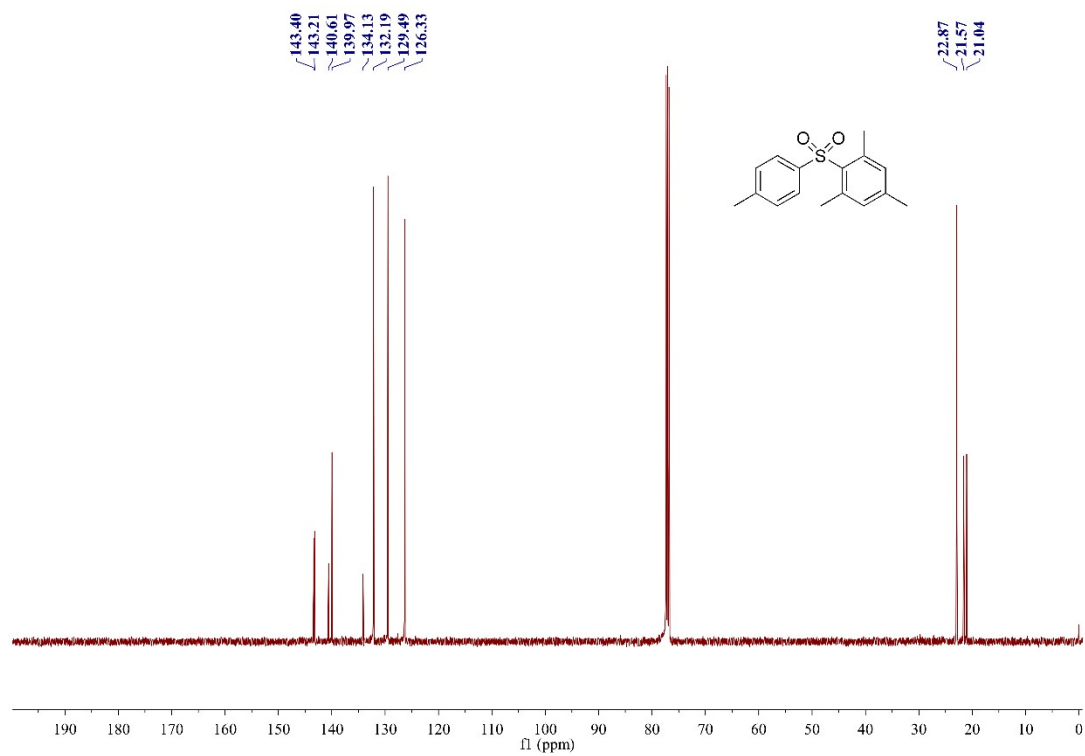



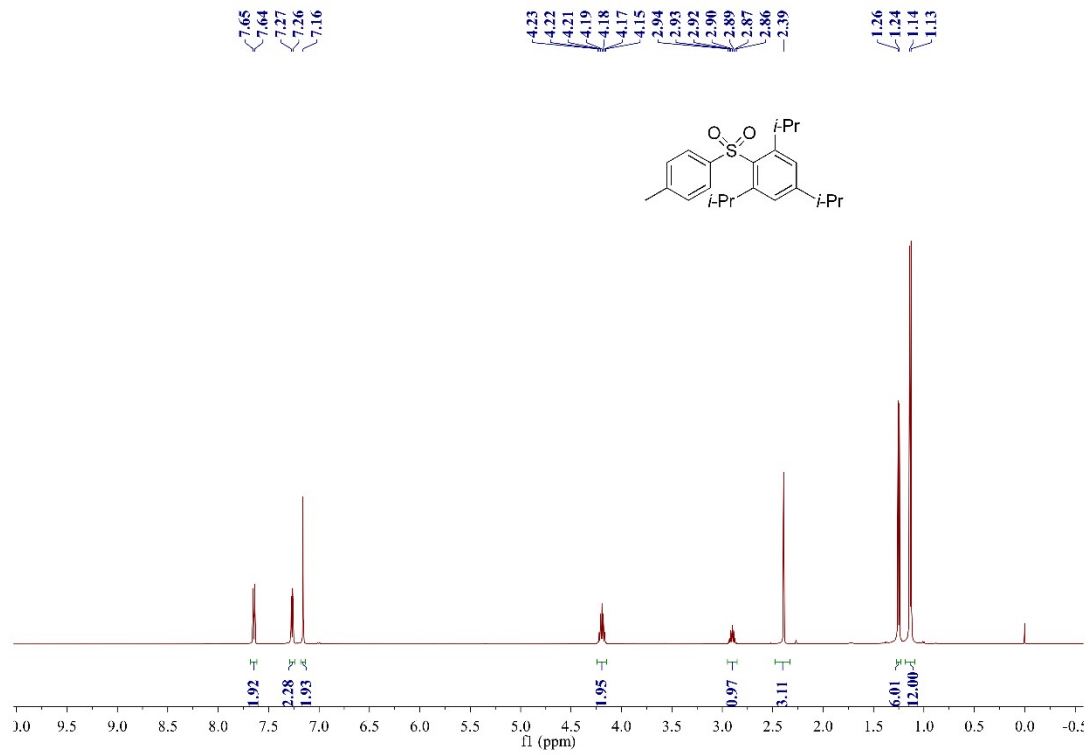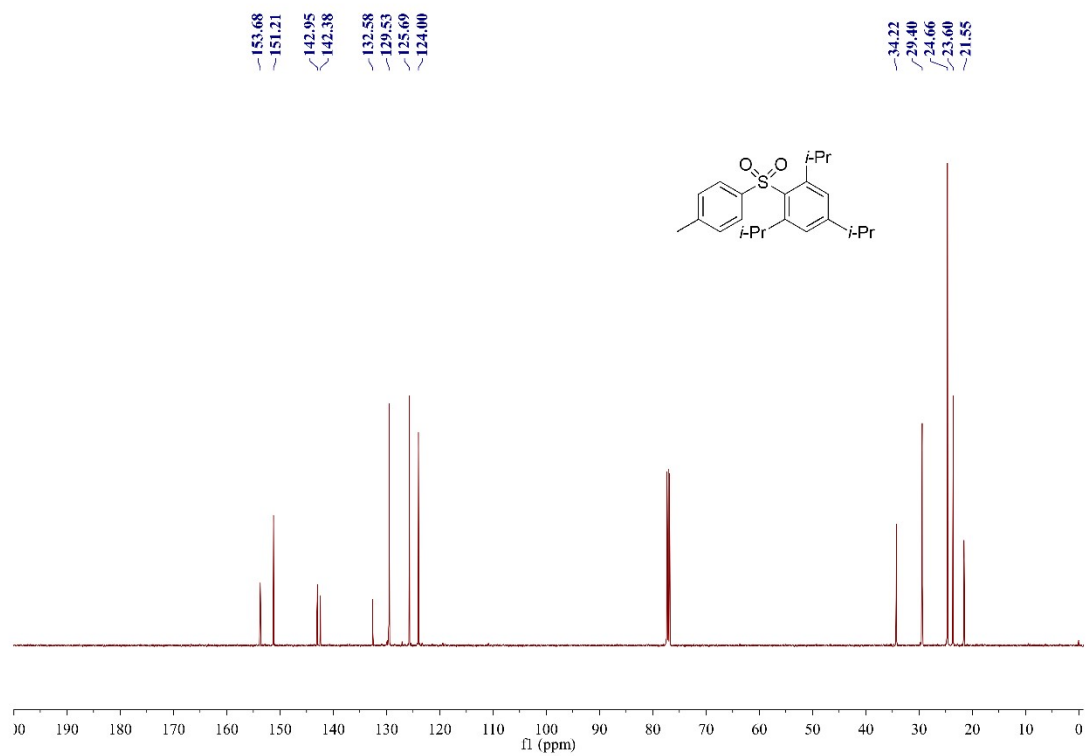

## 6. References

- 1 Zhao, J.-L., Guo, S.-H., Qiu, J., Gou, X.-F., Hua, C.-W. and Chen, B. *Tetrahedron Lett.*, **2016**, 57, 2375-2378.
- 2 Bielawski, M. and Olofsson, B. *Chem. Commun.*, **2007**, 2521-2523.
- 3 Zhu, D.-L., Wu, Q., Li, H.-Y., Li, H.-X. and Lang, J.-P. *Chem. Eur. J.*, **2020**, 26, 3484-3488.
- 4 Umierski, N. and Manolikakes, G. *Org. Lett.*, **2013**, 15, 188-191.
- 5 Ojha, S. and Panda, N. *Asian J. Org. Chem.*, **2021**, 10, 1665-1670.
- 6 Zhao, J., Niu, S., Jiang, X., Jiang, Y., Zhang, X., Sun, T. and Ma, D. *J. Org. Chem.*, **2018**, 83, 6589-6598.
- 7 Zheng, W., Lee, J. W., Morales-Rivera, C. A., Liu, P. and Ngai, M.-Y. *Angew. Chem. Int. Ed.*, **2018**, 57, 13795-13799.
- 8 Pandya, V. G. and Mhaske, S. B. *Org. Lett.*, **2014**, 16, 3836-3839.
- 9 Zheng, B., Jia, T. and Walsh, P. J. *Org. Lett.*, **2013**, 15, 1690-1693.
- 10 Wu, X. and Wang, Y. *New J. Chem.*, **2018**, 42, 10953-10957.
- 11 Yang, X., Shi, L. and Fu, H. *Synlett*, **2014**, 25, 847-852.
